1 **FZD10 regulates cell proliferation and mediates Wnt1**  
2 **induced neurogenesis in the developing spinal cord**

3 Abdulmajeed Fahad Alrefaei<sup>1,2</sup>, Andrea E. Münsterberg<sup>1,\*</sup> and Grant N.  
4 Wheeler<sup>1,\*</sup>

5 <sup>1</sup>School of Biological Sciences, University of East Anglia, Norwich  
6 Research Park, Norwich, NR4 7TJ, UK

7 <sup>2</sup>Present address: Jamoum University College, Department of Biology,  
8 University of Umm Al-Qura, Saudi Arabia

9 \*Corresponding author:email: [grant.wheeler@uea.ac.uk](mailto:grant.wheeler@uea.ac.uk) phone:  
10 +441603593988email: [a.munsterberg@uea.ac.uk](mailto:a.munsterberg@uea.ac.uk) Phone: +441603592232

11

12 Short title: FZD10 function in the developing spinal cord

13

14

15

16

17

18

19

20

21

## 22 **Abstract**

23 Wnt/FZD signalling activity is required for spinal cord development, including the dorsal-  
24 ventral patterning of the neural tube, where it affects proliferation and specification of  
25 neurons. Wnt ligands initiate canonical,  $\beta$ -catenin-dependent, signaling by binding to  
26 Frizzled receptors. However, in many developmental contexts the cognate FZD receptor  
27 for a particular Wnt ligand remains to be identified. Here, we characterized FZD10  
28 expression in the dorsal neural tube where it overlaps with both Wnt1 and Wnt3a, as well  
29 as markers of dorsal progenitors and interneurons. We show FZD10 expression is sensitive  
30 to Wnt1, but not Wnt3a expression, and FZD10 plays a role in neural tube patterning.  
31 Knockdown approaches show that Wnt1 induced ventral expansion of dorsal neural  
32 markers, Pax6 and Pax7, requires FZD10. In contrast, Wnt3a induced dorsalization of the  
33 neural tube is not affected by FZD10 knockdown. Gain of function experiments show that  
34 FZD10 is not sufficient on its own to mediate Wnt1 activity *in vivo*. Indeed excess FZD10  
35 inhibits the dorsalizing activity of Wnt1. However, addition of the Lrp6 co-receptor  
36 dramatically enhances the Wnt1/FZD10 mediated activation of dorsal markers. This  
37 suggests that the mechanism by which Wnt1 regulates proliferation and patterning in the  
38 neural tube requires both FZD10 and Lrp6.

## 39 **Introduction**

40 Following neural tube formation from the neural plate, complex tissue interactions and  
41 signalling pathways contribute to its patterning and differentiation, to generate well defined  
42 neuronal populations along its dorsal ventral (DV) axis. The roof and floor plates are  
43 signaling centres that govern the formation of sensory neurons in the dorsal part and motor

44 neurons in the ventral part. The roof plate secretes members of the Wnt and BMP families,  
45 whilst the floor plate produces Sonic hedgehog (Shh). These secreted signaling molecules  
46 are crucial for neural tube patterning along the dorso-ventral axis (reviewed in Le Dréau  
47 and Martí, 2012).

48 Wnt glycoproteins bind to Frizzled (FZD) receptors and Lrp5/6 co-receptors to initiate  $\beta$ -  
49 catenin/TCF-dependent activation of Wnt target genes in the nucleus (Nakamura et al.,  
50 2016; Moon et al., 2004; Logan and Nusse, 2004). Wnt proteins regulate cell proliferation  
51 and specification during nervous system development. In mice lacking Wnt1, the midbrain  
52 is lost and the hindbrain is affected. In Wnt3a knockout mice the anterior-posterior axis is  
53 truncated and the hippocampus is lost (reviewed in Amerongen and Berns, 2006). In Wnt1<sup>-</sup>  
54 <sup>-</sup>Wnt3a<sup>-/-</sup> double mutant mice the specification of dorsal neurons is affected (Ikeya et al.,  
55 1997; Muroyama et al., 2002).

56 Several Wnt family members, including Wnt1 and Wnt3a, are expressed in the roof plate  
57 of the neural tube in chick and mouse, where they promote proliferation of neural  
58 progenitors (Hollyday et al., 1995; Chesnutt et al., 2004; Dickinson et al., 1994; Zechner  
59 et al., 2003; Ille et al., 2007; Bonner et al., 2008). Additionally, Wnt1 and Wnt3a are  
60 implicated in dorso-ventral (DV) patterning of the neural tube and co-overexpression of  
61 Wnt1 and Wnt3a in the chick neural tube results in activation of dorsal markers (Pax6/7)  
62 and repression of ventral markers (Olig2 and Nkx2.2 ) (Alvarez-Medina et al., 2008). It is  
63 still unclear, however, which FZD receptors mediate canonical Wnt1/3a signaling in the  
64 neural tube.

65 Genetic experiments have shown that FZD receptors are involved in neural tube

66 development. For example, neural tube closure is affected in FZD1 and FZD2 knockout  
67 mice (Yu et al., 2010). The neural tube also fails to close in FZD3<sup>-/-</sup>FZD6<sup>-/-</sup> double  
68 mutants (Wang et al., 2006). FZD3 knockout mice show severe defects in axon  
69 development in the central nervous system and some neurons fail to migrate and cluster in  
70 the midline of the spinal cord (Hua et al., 2013; Wang et al., 2006). In addition the FZD  
71 co-receptor, Lrp6, which has been shown to bind Wnt1, is necessary for the activation of  
72 Wnt signaling (He et al., 2004; MacDonald and He, 2012; Tamai et al., 2000). Lrp6 is  
73 expressed in neural tube and its mutations result in neural tube defects including a failure  
74 of neural tube closure and disruption of cell polarity (Allache et al., 2014; Gray et al., 2013;  
75 Houston and Wylie, 2002). In chick embryos, expression of FZD receptors has been  
76 characterized during early development. FZD receptors are detected in different tissues,  
77 including the developing brain (Chapman et al., 2004; Fuhrmann et al., 2003; Stark et al.,  
78 2000; Quinlan et al., 2009; Theodosiou and Tabin, 2003).

79 FZD10 is one of the FZD family receptors that has been detected in different species,  
80 including zebrafish, *Xenopus*, chick and mouse (Galli et al., 2014; Kawakami et al., 2000a;  
81 Moriwaki et al., 2000; Wheeler and Hoppler, 1999; Nikaido et al., 2013; Yan et al., 2009).  
82 We previously showed that FZD10 is expressed in the dorsal neural tube (Wheeler and  
83 Hoppler, 1999) and using axis duplication assays in early *Xenopus* embryos, we showed  
84 that FZD10 acts through canonical Wnt signaling. In addition, a FZD10 knockdown  
85 phenotype was rescued by  $\beta$ -catenin injections, suggesting that  $\beta$ -catenin is downstream of  
86 FZD10 (Garcia-Morales et al., 2009).

87 Here we investigated the potential function of FZD10 as a mediator of canonical Wnt

88 signaling in the developing chick neural tube. We examined FZD10 expression and its  
89 relationship with Wnt1 and Wnt3a in the dorsal neural tube. Using *in ovo* electroporations  
90 of shRNA, we show that FZD10 knockdown affects cell proliferation and differentiation  
91 of the neural tube. Targeted mis- expression of Wnt1 and Wnt3a show that Wnt1 positively  
92 affects FZD10 expression whereas Wnt3a has no effect, suggesting that Wnt1 may act  
93 through FZD10. Consistent with this idea, FZD10-shRNA inhibited the Wnt1-mediated  
94 dorsalization of the neural tube. To determine the importance of the Lrp6 co-receptor in  
95 Wnt1/FZD10 signaling *in vivo* we used co-electroporations into the neural tube. This  
96 revealed that Lrp6 enhances Wnt1/FZD10 mediated activation of dorsal markers during  
97 spinal cord neurogenesis. Luciferase reporter assays (TOP-flash) confirmed that FZD10  
98 and Lrp6 are required for Wnt1 biological activity *in vivo*. This suggests the mechanism  
99 by which Wnt1 regulates proliferation and patterning of the developing spinal cord  
100 involves interactions with both FZD10 and Lrp6.

## 101 **Results**

### 102 **FZD10 is expressed in the dorsal domain of the spinal cord during neurogenesis**

103 To identify receptors that could potentially mediate Wnt signalling during spinal cord  
104 neurogenesis we performed expression analysis of multiple frizzled (FZD) receptors in  
105 chick embryos. Subsequent investigations focused on FZD10, and a detailed time course  
106 examined FZD10 expression before the onset of neurogenesis, during initiation of  
107 neurogenesis and during formation of dorsal neurons (Fig. 1). At HH12, before the onset  
108 of neurogenesis, FZD10 expression was graded from dorsal to ventral (Fig. 1A). FZD10  
109 continued to be expressed in the spinal cord but expression became dorsally restricted

110 during the initiation of neurogenesis (Fig. 1A, HH14-20). During neurogenesis (HH18-24),  
111 FZD10 was expressed in regions of the spinal cord where dorsal progenitors arise (Fig. 1A,  
112 HH18-24). High levels of FZD10 transcripts were seen in the ventricular zone where  
113 progenitors are still proliferating.

114 Based on the expression of specific transcription factors the dorsal ventral axis of the spinal  
115 cord can be divided into eleven domains. For example, Pax3/7 expression marks the dorsal  
116 progenitor domains dp1-6, and Pax6 marks dorsal progenitor domains, low expression in  
117 dp1-3 and higher expression in dp4-6, and one intermediate ventral progenitor domain, p0  
118 (Le Dreau and Marti, 2012). Expression was compared to these well-characterized markers  
119 at stage HH24 (Fig. 1B-F and H-K), and FZD10 expression overlapped with Pax3 and Pax7  
120 in progenitor domains dp 1- 5 (Fig. 1B, C, D, F). In addition, FZD10 and Pax7 were  
121 expressed in the roof plate but Pax3 was not (Fig. 1C, D, F). In dorsal progenitor domains  
122 dp1-5, FZD10 overlapped with Pax6 expression which was weakly expressed there (Fig.  
123 1B, C, E). FZD10 expression was seen in dorsal regions in which neural differentiation  
124 markers were expressed: Ngn1 (dp 2), Islet1 (dp 3) (Fig. 1G, H, I, K) and Lhx1/5 (dp 2-4)  
125 (Fig. 1J and K). In summary, FZD10 was strongly expressed in dorsal domains of the spinal  
126 cord that were positive for dorsal progenitor interneuron markers.

127 **Figure 1: FZD10 expression in the neural tube correlates with markers of neural**  
128 **progenitors and differentiated neurons.** (A) In situ hybridization shows the dorso-  
129 ventral extent of FZD10 expression from HH12-24. (B) Transverse section of the  
130 developing spinal cord at stage HH24 stained with DAPI; red circles represent 6 dorsal  
131 progenitor domains (dp 1-6) and green circles represent 5 ventral progenitor domains. (C)  
132 FZD10 transcript distribution compared with progenitor markers (D) Pax3, (E) Pax6 and

133 (F) Pax7 detected by immunostain. (G) Schematic representation of differentiated neuron  
134 marker expression at HH24. (H) FZD10 expression compared with differentiated neurons  
135 markers detected by in situ hybridization, (I) Ngn1, or by immunostain, (J) Lhx1/5 and  
136 (K) Islet1. The same sections are shown in (C) and (H).

137 **FZD10 knockdown affects cell proliferation, dorso-ventral patterning and**  
138 **neurogenesis**

139 To determine the requirement of FZD10 in spinal cord development three plasmids were  
140 commercially designed producing short-hairpin RNAs (shRNA) specifically against chick  
141 FZD10. FZD10 shRNA plasmids (pRFP-C-RS) were electroporated into one side of chick  
142 neural tubes at stage HH11-12. After 48 hours, embryos were screened for RFP expression  
143 and processed for phenotypic analysis by in situ hybridization. First, shRNA vectors were  
144 electroporated individually to assess FZD10 knockdown. Electroporation of FZD10  
145 shRNA vectors B and C resulted in an overall reduction of endogenous FZD10 transcripts  
146 on the electroporated side of the spinal cord compared to the non-electroporated side.  
147 Although electroporation is mosaic and there is residual expression. Scrambled shRNA  
148 plasmids had no effect on expression of FZD10 (Supp Fig. 1).

149 Next, we analysed the effects of FZD10 knockdown on spinal cord development.  
150 Cryosections of embryos electroporated with FZD10 shRNA plasmids showed that the  
151 electroporated side was thinner with a shortened dorso-ventral axis (Fig. 2 D, E),  
152 suggesting that proliferation could be affected in the ventricular zone where neural  
153 progenitors are located. To confirm this, we used immunostaining for phospho-histone H3  
154 (pH3). Quantification of the number of pH3 positive cells showed that the number of

155 mitotic cells was reduced on the experimental side of the spinal cord after FZD10  
156 knockdown (1.4 fold,  $p=0.01$ ) (Fig. 2 F). Scrambled shRNA plasmids did not affect number  
157 of pH3 positive cells (Fig. 2 C). This showed that FZD10 knockdown by shRNA results in  
158 a reduction in cell polifration in the neural tube. Consistent with these results FZD10  
159 knockdown by morpholinos reduced poliferation in dorsal regions of the neural tube in a  
160 previous report (Galli et al., 2014).

161 **Figure 2: Knockdown of FZD10 results in a decrease in cell proliferation in the**  
162 **neural tube.** (A, B, D, E) Cross sections of neural tube stained with DAPI and phosphor-  
163 histone H3 (green), showing the electroporated (RFP+ve) and non-electroporated sides.  
164 Electroporation with scrambled or FZD10 shRNA vectors as indicated. (C)  
165 Quantification of pH3 positive cells revealed that scrambled shRNA induced no  
166 significant difference in the number of proliferative cells on electroporated (EP)  
167 compared to the non-electroporated (Un-EP) side of the neural tube. (F) Quantification of  
168 the number of pH3 positive cells per section in the neural tube electroporated with  
169 FZD10 shRNA vector. Compared to the non-electroporated side there was a statistically  
170 significant decrease in the number of pH3 positive cells (students t-test (paired)).

171

172 To examine effects of FZD10 knockdown on dorsal-ventral patterning and neural  
173 differentiation, we used markers that overlap with regions of FZD10 expression. FZD10  
174 shRNA vectors were electroporated into one side of the neural tube at HH11-12, followed  
175 by incubation for 24 or 48 hours. Cryosections were immunostained for RFP, Pax6 and  
176 Pax7. After 24 hours post- electroporation the Pax7 expression domain was shifted dorsally



177 on the FZD10 shRNA transfected side compared to the control side (Supp Fig. 2D-F).  
178 Similar observations were made after 48 hours post-electroporation of FZD10-shRNA; the  
179 expression domains of Pax6 and Pax7 were dorsally restricted on the electroporated side  
180 compared to the control side (12/13) (Fig. 3B, D). Scrambled shRNA electroporation had  
181 no effect on expression of Pax7 or of other markers (Supp Fig. 2 A-C, Fig. 3 A, C). Next,  
182 we assessed effects of FZD10 knockdown on spinal cord neurogenesis. After  
183 electroporation with scrambled or FZD10 shRNA vector into neural tubes at stage HH11-  
184 12, embryos were immunostained for differentiated neuron markers Lhx1/5 and Tuj-1.  
185 After 48 hours, Lhx1/5 expression was strongly reduced on the electroporated side of the  
186 spinal cord compared to the control (n=7/8) (Fig. 3F-F''), scrambled shRNA plasmid had  
187 no effect (Fig. 3E, E'). Tuj-1 expression was reduced 24 hours after electroporation with  
188 FZD10 shRNA on the electroporated side (Supp Fig. 2H). A reduction of Tuj-1 expression  
189 was also evident 48 hours post- electroporation, especially in the dorsal domain when  
190 compared with the control side (7/8) (Fig. 3H- H''). Area measurements using ImageJ/Fiji  
191 showed that areas of expression were reduced for Pax7, Pax6, lhx1/5 and Tuj1 on the  
192 FZD10-shRNA electroporated side (Fig. 3B'', D'', F'', H''). Thus electroporation of FZD10  
193 shRNA vectors inhibited cell proliferation in the ventricular zone and therefore affected  
194 dorso-ventral spinal cord patterning and neurogenesis.

195 **Figure 3: Effects of FZD10 knockdown on neurogenesis 48hours post-**  
196 **electroporation.**

197 Scrambled or FZD10 shRNA vectors were electroporated into neural tubes, these vectors  
198 expressed RFP to indicate successful transfection. (A,A') Pax7 expression was identical  
199 on both sides after scrambled shRNA-vector electroporation. (B,B') The ventral extend

200 of the Pax7 domain was reduced on the electroporated side after FZD10 shRNA  
201 transfection. (C,C') Pax6 expression was not affected after scrambled shRNA. (D, D')  
202 But Pax6 expression was shifted dorsally on the electroporated side of the spinal cord  
203 after electroporation with the FZD10 shRNA-vector. (E, E') Lhx1/5 expression in  
204 embryos electroporated with scrambled shRNA. (F, F') Lhx1/5 expression was reduced  
205 after FZD shRNA-vector electroporation. (G, G') Tuj-1 expression after scrambled  
206 shRNA electroporation. (H,H') Tuj-1 expression was reduced in the spinal cord  
207 electroporated with FZD10 shRNA-vector. (B'', D'', F'' and H'') ImageJ was used to  
208 measure and compare the areas of expression on both sides of the spinal cord after  
209 FZD10 shRNA electroporation; neural marker expression was reduced on electroporated  
210 sides (EP).

### 211 **Wnt1 regulates FZD10 expression in the developing spinal cord**

212 Wnt1 and Wnt3a are known to be involved in proliferation, neural specification and dorsal-  
213 ventral patterning of chick and mouse neural tube, and targeted misexpression of Wnt1 and  
214 Wnt3a leads to a ventral expansion of dorsal markers (Alvarez-Medina et al., 2008;  
215 Megason et al., 2002; Muroyama et al., 2002). First, we recapitulated these results (Supp  
216 Figs. 3, 4). Next, to investigate whether this is mediated by FZD10, we determined that  
217 FZD10 was co-expressed with Wnt1 and Wnt3a in the dorsal neural tube and roof plate  
218 (Supp Fig. 5). At stage HH14, FZD10 expression overlapped with Wnt1 and Wnt3a in the  
219 dorsal domain of the neural tube. By HH20, Wnt1 and Wnt3a expression was dorsally  
220 restricted whilst FZD10 expression still extended across the dorsal part of the spinal cord,  
221 consistent with a previous report (Galli et al., 2014). We next asked if FZD10 expression  
222 is affected by Wnt1 and Wnt3a electroporation in the neural tube. Embryos were

223 electroporated at HH11-12 and after 48hours GFP indicated the transfected area. In situ  
224 detection of FZD10 transcripts after Wnt1 transfection revealed its broader and ventrally  
225 extended expression with strong signal in the roof plate (n=13/15 ) (Fig. 4A, B). However,  
226 FZD10 expression was not affected by Wnt3a (n=12/15) (Fig. 4C, D), suggesting that Wnt1  
227 but not Wnt3a regulates expression of FZD10 in the dorsal neural tube.

228 **Figure 4: FZD10 expression expands ventrally following Wn1 misexpression.**

229 (A) GFP expression on the electroporated side indicating ectopic Wnt1 expression. (B)  
230 FZD10 expression was ventrally expanded on the transfected side as shown by (B') area  
231 measurements. (C) GFP expression indicates ectopic Wnt3a expression. (D) FZD10  
232 expression was unchanged on the transfected side as shown by (D') area measurements.

233 **FZD10 is required for dorsalization of the neural tube in response to Wnt1 but not**  
234 **Wnt3a.**

235 Previous work showed that FZD10 mimics canonical Wnt activity and results in axis  
236 duplication in early *Xenopus* embryos (Garcia-Morales et al., 2009). Since Wnt1 promoted  
237 expression of FZD10, we wondered whether FZD10 is required for Wnt1 dependent dorsal  
238 patterning of the neural tube. To address this, we assessed whether shRNA-mediated  
239 FZD10 knockdown could rescue the effects of Wnt1 or Wnt3a overexpression on dorsal  
240 neural tube patterning. Embryos were co-electroporated at HH11/12 with Wnt1 or Wnt3a  
241 expression vectors and scrambled or FZD10 shRNA vectors (Fig 5). Co-electroporation of  
242 scrambled shRNA vectors with Wnt1 (n=8/8) or Wnt3a (n=6/6) had no effect on the ventral  
243 expansion of neural markers Pax6 and Pax7 after 48 hours (Fig. 5 A, F, C, H, Supp Figs.  
244 3, 4). In contrast, co-electroporation of FZD10 shRNA lessened the effect of Wnt1

245 overexpression (n=14/14) and expression domains of Pax6 and Pax7 on the electroporated  
246 side were comparable to the control side (Fig. 5 B, D). Interestingly, the Wnt3a-induced  
247 ventral expansion of Pax6/Pax7 was not affected by FZD10 knockdown (n=13/14) (Fig. 5  
248 G, I). The effects of scrambled and FZD10 shRNA transfection on Wnt1 and Wnt3  
249 mediated neural tube patterning were quantified by area measurements using ImageJ/Fiji  
250 (Fig. 5 E, J). This showed that FZD10 is required for Wnt1-dependent ventral expansion  
251 of dorsal neural tube markers, although a direct interaction between Wnt1 and FZD10  
252 remains to be confirmed. The results also indicated that Wnt3a presumably acts through  
253 different FZD receptors.

254 **Figure 5: FZD10 mediates Wnt1-induced ventral expansion of dorsal neural tube**  
255 **markers.**

256 (A, C, E) Immunostaining showed that Pax6 and Pax7 expression was ventrally expanded  
257 after Wnt1 co-electroporation with scrambled shRNA. (B, D, E) Co-electroporation of  
258 FZD10 shRNA with Wnt1 inhibited the Wnt1-induced phenotype and abrogated the  
259 ventral expansion of Pax6 and Pax7 expression domains on the electroporated side. Co-  
260 electroporation of Wnt3a with (F, H) scrambled shRNA or (G, I) FZD10 shRNA had no  
261 effect on the Wnt3a induced phenotype and ventral expansion of Pax6 or Pax7 was  
262 evident on the electroporated sides of the spinal cord (J).

263 **Lrp6 co-receptor enhances FZD10 function during Wnt1 induced spinal cord**  
264 **dorsalization**

265 Interestingly, FZD10 overexpression on its own did not lead to a ventral expansion of  
266 dorsal neural tube markers. Indeed, the expression of Pax6 and Pax7 was shifted dorsally

267 and the ventral marker Nkx2.2 was expanded after electroporation of a FZD10 expression  
268 vector (Supp Fig. 6). This suggests FZD10 alone is not sufficient to dorsalize the neural  
269 tube. To explain the dorsal shift of Pax6 and Pax7 induced by FZD10 we tested whether  
270 receptor overexpression may restrict Wnt1 ligand, possibly by acting as a sponge.  
271 Consistent with this idea, FZD10 electroporation together with Wnt1 abrogated the Wnt1-  
272 induced phenotype and the ventral expansion of Pax7 was less pronounced compared to  
273 that seen after Wnt1 electroporation alone (Fig. 6 G, compare with Fig. 5 A). In addition,  
274 lengthening of the dorso-ventral axis was no longer evident; axis expansion often leads to  
275 a kink in the ventral part of the spinal cord and can be seen after overexpression of Wnt1  
276 or Wnt3a (Fig. 6 E-H compare with Fig. 5 A, C). Furthermore, co-electroporation of  
277 FZD10 with LRP6, the frizzled co-receptor, or overexpression of LRP6 on its own, did not  
278 result in a ventral expansion of the dorsal marker Pax7 (n=8/10)(Fig. 6 A-D and data not  
279 shown). To test whether this could be due to a limited availability of endogenous Wnt1  
280 ligand in the tissue we co-transfected FZD10, LRP6 and Wnt1 into the neural tube. This  
281 led to a dramatic lengthening of the axis and to ventral expansion of Pax7 expression  
282 compared to the control side (Fig. 6 I-L). Transfection of receptor and co-receptor, FZD10  
283 and LRP6, together with Wnt1 enhanced the phenotype compared to Wnt1 alone (Supp  
284 Fig. 7).

285 To quantify the Wnt activity present in the tissue we transfected a TOP-flash luciferase  
286 plasmid into the neural tube. TOP-flash luciferase reports canonical Wnt activation and  
287 was transfected either on its own or together with Wnt1, Wnt1 and FZD10 shRNA, or  
288 Wnt1, FZD10 and LRP6. Luciferase reads were normalized against Renilla and vector only  
289 reads. Wnt1 led to an increase in luciferase activity by 20%, indicative of increased

290 transcriptional activation. This was inhibited by FZD10 shRNA, suggesting that FZD10  
291 mediates the response to Wnt1. Addition of both FZD10 and the LRP6 co-receptor  
292 enhanced the Wnt1-induced activation of luciferase expression. These findings are  
293 consistent with the idea that Wnt1 dependent dorso-ventral patterning and neurogenesis in  
294 the developing spinal cord involves FZD10 and its co-receptor Lrp6.

295 **Figure 6: FZD10 requires the Lrp6 co-receptor to mediate Wnt1 activity in the**  
296 **neural tube.**

297 (A, E, I) DAPI staining of transverse sections through a HH24 neural tube. (B, F, J) GFP  
298 detection on the electroporated side reports the extend of ectopic expression of FZD10,  
299 LRP6 and Wnt1, as indicated on the left. (C, D) FZD10 co-electroporation with Lrp6  
300 slightly restricted the ventral extend of Pax7 expression compared to the control side  
301 (n=8/10) suggesting limited availability of endogenous Wnt1 ligand. (G, H) FZD10 co-  
302 electroporation with Wnt1 attenuated the Wnt1 overexpression phenotype; the kink in the  
303 ventral spinal cord was missing and ventral Pax7 expansion was reduced (n=4/5). (I-L)  
304 Electroporation of FZD10, LRP6 and Wnt1 in combination resulted in overgrowth on the  
305 electroporated side of the spinal cord (I, J) and the ventral expansion of the Pax7 expression  
306 domain (K, L) (N=5/5). (M) Luciferase activity resulting from TOP-flash reporter  
307 expression is shown, normalized to reporter plasmid alone. The presence of Wnt1 alone  
308 increased luciferase activity, this was inhibited by FZD10 knockdown and enhanced by co-  
309 transfection of FZD10 and LRP6. All transfections also normalized to Renilla luciferase.

310 **Discussion**

311 Wnt/FZD signaling, in particular canonical Wnt signaling, is essential for neural

312 development. This includes findings that Wnt1 and Wnt3a, two canonical Wnt ligands, are  
313 required for cell proliferation in the neural tube (Dickinson et al., 1994; Megason and  
314 McMahon, 2002; Muroyama et al., 2002). In addition, co-electroporation of Wnt1 and  
315 Wnt3a results in the ventral expansion of dorsal marker genes, Pax7 and Pax6, (Alvarez-  
316 Medina et al., 2008). Indeed, electroporation of either Wnt1 or Wnt3a leads to ventral  
317 expansion of Pax7 and Pax6 in the neural tube, indicating that both Wnt ligands can  
318 regulate dorso-ventral neural tube patterning (Supp Figs. 3 and 4). However it is not known  
319 which frizzled receptor is mediating Wnt1 and Wnt3a activity.

320 Here we identify FZD10 as a receptor, which mediates Wnt1 but not Wnt3a activity in the  
321 chick neural tube. We show that the dorsally restricted expression of FZD10 in the neural  
322 tube and roof plate, also reported by (Galli et al., 2014), overlaps with both Wnt1 and  
323 Wnt3a (Supp Fig. 4) and with well-characterized dorsal progenitor markers, Pax3 and  
324 Pax7, during neurogenesis (Fig. 1). In situ proximity ligation assays showed that *in vitro*  
325 FZD10 interacts with both Wnt1 and Wnt3a (Galli et al., 2014). We determined whether  
326 Wnt1 and/or Wnt3a affect FZD10 expression *in vivo*. We find that in response to Wnt1  
327 FZD10 expression extends ventrally, but it is not affected by Wnt3a transfection into the  
328 neural tube (Fig. 4). This suggests that FZD10 expression is regulated by Wnt1 in the dorsal  
329 neural tube and is consistent with the idea that FZD10 mediates Wnt1 function in this  
330 context. Although it should be emphasized that transcriptional regulation of a FZD receptor  
331 gene by a Wnt ligand does not necessarily mean that they interact at the protein level. In  
332 the case of Wnt1 and FZD10 a direct interaction in a physiological context remains to be  
333 confirmed.

334 FZD10 expression suggests that it may be required for dorsal neural tube development.

335 Consistent with this, we show that shRNA-mediated knockdown of FZD10 results in a  
336 significant decrease in the number of mitotic cells in the developing neural tube (Fig. 2).  
337 This implies that FZD10 is required for cell proliferation in the spinal cord and is in keeping  
338 with the role of canonical Wnt in cell proliferation (Dickinson et al., 1994; Megason and  
339 McMahon, 2002). Moreover, the activation of dorsal genes, Pax7 and Pax6, is inhibited by  
340 FZD10 knockdown as their expression domains are reduced (Fig. 3). Neurogenesis is also  
341 inhibited as the expression domains of differentiation markers, Lhx1/5 and Tuj1, are  
342 reduced (Fig. 3). The knockdown is mosaic, and it is not clear at present whether FZD10  
343 affects proliferation and the expression of these marker genes directly or indirectly. In  
344 addition, FZD10 knockdown by shRNA could rescue the Wnt1-induced dorsalisation of  
345 the neural tube, as shown by lack of ventral Pax7 expansion. The effect of Wnt1 on Pax6  
346 expansion was more subtle, but a rescue by FZD10 shRNA is still apparent (Fig. 5). In  
347 contrast, the Wnt3a mediated ventral expansion of dorsal genes, Pax6 and Pax7, is not  
348 affected by FZD10 knockdown (Fig. 5). This suggests that FZD10 is required for dorsal  
349 neural tube patterning and neurogenesis mediated by Wnt1, but not Wnt3a.

350 This is reminiscent of previous *in vivo* and *in vitro* studies. In particular, FZD10 did not  
351 synergise with Wnt3a in *Xenopus* animal cap assays, suggesting there is no interaction  
352 between Wnt3a and FZD10 (Kawakami et al., 2000). We reported previously that FZD10  
353 synergises with Wnt1 and Wnt8, but not with Wnt3a, to induce axis duplication in *Xenopus*  
354 embryos (Garcia- Morales et al., 2009). In addition, FZD10-CRD did not interact with  
355 Wnt3a in co- immunoprecipitation experiments (Carmon and Loose, 2010). Thus our  
356 results agree with those of others and together they show that FZD10 mediates Wnt1 but  
357 not Wnt3a biological activity in different scenarios. In the dorsal neural tube, Wnt3a may



358 function through different FZD receptors; good candidates are FZD1 and FZD3. Consistent  
359 with this hypothesis, Wnt3a is capable of activating canonical Wnt signalling through  
360 FZD1 in P12 cells (Chacon et al., 2008).

361 Interestingly, expression of FZD10 alone does not cause a ventral expansion of dorsal  
362 neural tube markers, instead the expression domains of Pax6 and Pax7 are restricted  
363 dorsally on the experimental side (Supp Fig. 5). This is surprising as FZD10 activated  
364 canonical Wnt signaling should promote proliferation and neurogenesis in the dorsal spinal  
365 cord. We propose that full-length cFZD10 may interfere in a dominant negative manner by  
366 forming ineffective receptor-ligand complexes. This is supported by a study reporting that  
367 overexpression of full-length cFZD1 or cFZD7 mimics the effect of overexpression of  
368 dominant-negative forms of these two FZDs in the developing chick wing (Hartmann and  
369 Tabin, 2000). Furthermore, excess FZD10 receptor may restrict Wnt1 ligand, for example  
370 by acting as a sponge. Consistent with this idea, FZD10 electroporation together with Wnt1  
371 has a negative effect on the Wnt1-induced phenotype; the ventral expansion of Pax7 is less  
372 pronounced compared to that seen after Wnt1 electroporation alone (Fig. 6G, compare with  
373 Fig. 5A). Our data suggest that FZD10 requires Lrp6 co-receptor to activate canonical Wnt  
374 signaling effectively. Lrp6 is expressed in the developing chick neural tube and binds Wnt1  
375 (Avile and Stoeckli., 2015; He et al., 2004; MacDonald and He et al., 2012; Tamai et al.,  
376 2000). Co-transfection of Lrp6 with FZD10 and Wnt1 into the neural tube leads to a  
377 dramatic lengthening of the dorso-ventral axis and to ventral expansion of the Pax7  
378 expression domain compared to the control side (Fig. 6 I-L). The overgrowth on the  
379 experimental side is likely due to increased proliferation, leading to increased cell number.  
380 In addition, we show that Wnt1 increased the luciferase activity of a canonical Wnt reporter

381 by 20%, indicative of increased transcriptional activation. Addition of both FZD10 and the  
382 LRP6 co-receptor further enhanced the Wnt1 induced activation of luciferase expression,  
383 but FZD10 shRNA negatively affected the response. (Fig. 6M).

384 Taken together, we show that FZD10 is required for neural tube development and we  
385 propose that it may be the cognate receptor that mediates Wnt1 biological activity in the  
386 developing neural tube, although direct interactions remain to be confirmed *in vivo*. In  
387 addition, we show that Lrp6 is essential for effective signaling to regulate proliferation and  
388 dorso-ventral patterning. At present Wnt/FZD interactions and ligand-receptor selectivity  
389 are not fully understood. We propose that the chick neural tube presents an accessible tool  
390 to dissect Wnt-FZD interactions and selectivity in more detail.

391

## 392 **Materials and Methods**

### 393 **Injection and electroporation into neural tube.**

394 Fertile chick eggs were obtained from a commercial supplier and incubated for up to 3  
395 days. Embryos at this stage are not subject to any legislation (Animals Scientific  
396 Procedures Act) as they are less than 2/3 of gestation. The research conducted in the  
397 laboratory was approved by the UEA Animal Welfare & Ethical Review  
398 Board (08032018). Fertilized eggs were incubated at 37<sup>0</sup>C until the desired stage of  
399 development was reached (Hamburger and Hamilton, 1992). Expression constructs or  
400 shRNA were injected into the lumen of neural tubes of HH11-12 embryos and embryos  
401 were electroporated using 24V, five 50msec pulses with 100msec intervals. Embryos were

402 harvested after 24 or 48 hours for analysis, at least 3 embryos were examined per  
403 experimental condition and marker gene.

404

405 **Whole-mount in situ hybridization, cryosections, area measurements and**  
406 **photography.**

407 Embryos were collected into DEPC treated PBS, cleaned and fixed in 4%  
408 paraformaldehyde overnight at 4<sup>o</sup>C. Whole mount in situ hybridization was performed as  
409 previously described (Schmidt et al., 2004; Goljanek-Whysall et al., 2014). For  
410 cryosectioning, embryos were embedded in OCT (Tissuetec) and 20  $\mu$ m sections were  
411 collected on TESPA coated slides, washed with PTW, coverslipped with Entellan (Merck,  
412 Germany) and examined using an Axioplan microscope (Zeiss). Whole mount embryos  
413 were photographed on a Zeiss SV11 dissecting microscope with a Micropublisher 3.5  
414 camera and acquisition software. Sections were photographed on an Axiovert (Zeiss) using  
415 Axiovision software. Images were imported into Fiji/ImageJ, and areas of staining were  
416 calculated from binary images by calculating pixel numbers from injected and noninjected  
417 sides (Abou-Elhamd et al., 2015; Mok et al., 2018). A minimum of 10 sections from three  
418 embryos were analysed for each experiment. Statistical analysis used GraphPad Prism  
419 (version 6) software. Mann–Whitney nonparametric two-tail testing was applied to  
420 determine P-values. Montages of images were created and labeled using Adobe Photoshop.

421 **DNA constructs**

422 Plasmids encoding mouse Wnt1 and Wnt3a (pCIG) were kindly provided by Elisa Marti  
423 (Alvarez- Medina et al., 2008). The full length coding sequence for FZD10 was amplified

424 by PCR from cDNA prepared from HH18 chick embryos using standard molecular biology  
425 protocols. Primers were designed using FZD10 sequences for the chicken from NCBI  
426 (<http://www.ncbi.nlm.nih.gov>) using accession number (NM\_204098.2). Restriction sites  
427 were added, FZD10 primer sequences were: Not1+FZD10 forward: 5'-  
428 GCGGCCGCATGTGCGAGTGGGAAGAGGTG-3' and EcoR1+ HA tag +FZD10  
429 reverse:5'-  
430 GAATTCTCAAGCGTAATCTGGAACATCGTATGGGTATCATAACACAG-  
431 GTGGGTGGTTG-3'. PCR products were cloned into pGEM-T (Promega) and sequenced.  
432 FZD10 was subcloned into the pCA -IRES-GFP vector using EcoRI and NotI restriction  
433 enzymes for electroporation. pCS2-hLrp6 was obtained from Addgene. Short RNA hairpin  
434 (sh-RNA)-based expression vectors for RNA interference pRFP-C-RS (FZD10 shRNAs  
435 and scrambled shRNA) were purchased from Origene. The three sequences were: 'A' –  
436 GTACAACATGACGAGAATGCC- GAACCTGA, 'B' –  
437 TGGATTGCCATCTGGTCCATTCTGTGCTT, 'C'- GCAAGCGTTATTACCAGT-  
438 AGTGGAATCTA

### 439 **In vivo luciferase-reporter assay**

440 Transcriptional activity assays of  $\beta$  -catenin/Tcf pathways were performed in the neural  
441 tube as described by (Alvarez-Medina et al., 2008). Chick embryos were electroporated at  
442 HH stage 11/12 with the following DNAs: Wnt1, FZD10, hLrp6 and FZD10 shRNA, or  
443 with empty pCA vector as control, together with a TOPFLASH luciferase reporter  
444 construct containing synthetic Tcf-binding sites (Korinek et al., 1998) and a Renilla-  
445 luciferase reporter (Promega) for normalization. Embryos were harvested after 24 hours  
446 incubation and GFP-positive neural tubes were dissected and homogenized with a douncer

447 in Passive Lysis Buffer. Firefly- and Renilla-luciferase activities were measured by the  
448 Dual Luciferase Reporter Assay System (Promega). Statistical analysis was performed by  
449 Student's t-test.

#### 450 **Immunohistochemistry**

451 Immunohistochemistry was performed as described previously (Abu-Elmagd et al., 2010).  
452 Sections were incubated overnight at 4<sup>o</sup>C with primary antibodies at the following  
453 concentrations: Pax6, Pax7, Nkx2.2 (74.5A5), Islet1 (40.2D2), Lhx1/5 (4F2) (1:100, all  
454 from Developmental Studies Hybridoma Bank, University of Iowa), anti-rabbit phospho-  
455 histone H3 (5:1000, Abcam), anti-mouse Tuj1 (2:1000, Covance), anti-rabbit RFP (2:1000,  
456 Abcam). Secondary antibodies were anti-rabbit Alexa Fluor 488/568, anti-mouse Alexa  
457 Fluor 488/568, and anti-mouse Alexa Fluor 350 (Invitrogen) at 1 mg/ml in 10% goat  
458 serum/PBS. DAPI was used at a concentration of 0.1 mg/ml in PBS. After staining,  
459 cryosections were mounted and visualized using an Axioscope microscope using  
460 Axiovision software (Zeiss, Germany). Images were imported into Adobe Photoshop for  
461 analysis and labeling. Statistical analysis was performed by Student's t-test.

#### 462 **Acknowledgements**

463 We thank Drs Timothy Grocott and Gi Fay Mok and the rest of the Wheeler and  
464 Münsterberg labs for discussions, Prof Elisa Marti for providing plasmids and insightful  
465 comments, Dr Paul Thomas for support in the Henry Wellcome Laboratory of Cell  
466 Imaging.

#### 467 **Competing Interests**

468 The authors declare no competing or financial interests.

469 **Author contributions**

470 Conceptualization: AM, GW; Methodology: AFA, AM, GW ; Validation: AFA, Formal  
471 analysis: AFA, AM, GW; Investigation: AFA, AM , GW; Resources: AM, GW; Data  
472 curation: AFA, AM, GW; Writing: AFA, AM, GW; Visualization: AFA, AM, GW;  
473 Supervision: AM, GW; Project administration: AM, GW; Funding acquisition: AFA, AM,  
474 GW

475 **Funding**

476 AFA was funded by Umm Al-Qura University. AM and GW were supported by the  
477 Biotechnology and Biological Sciences Research Council (BBSRC) (grant numbers  
478 BB/K003437 and BB/I022252 respectively)

479 **References**

480 Abou-Elhamd, A., Alrefaei, A.F., Mok, G.F., Garcia-Morales, C., Abu-Elmagd, M.,  
481 Wheeler, G.N. and A.E. Münsterberg (2015). Klf131 attenuates beta-catenin dependent  
482 Wnt signaling and regulates embryo myogenesis. *Dev Biol* 402, 61-71.

483 Abu-Elmagd, M., Robson, L., Sweetman, D., Hadley, J., Francis-West, P. and A.E.  
484 Münsterberg (2010). Wnt/Lef1 signaling acts via Pitx2 to regulate somite myogenesis. *Dev*  
485 *Biol* 337, 211-219.

486 Allache, R., S. Lachance, M. C. Guyot, P. De Marco, E. Merello, M. J. Justice, V. Capra  
487 and Z. Kibar (2014). "Novel mutations in Lrp6 orthologs in mouse and human neural tube

488 defects affect a highly dosage-sensitive Wnt non-canonical planar cell polarity pathway."

489 Human molecular genetics 23(7): 1687-1699.

490 Alvarez-Medina, R., J. Cayuso, T. Okubo, S. Takada and E. Martí (2008). "Wnt canonical

491 pathway restricts graded Shh/Gli patterning activity through the regulation of Gli3

492 expression." Development 135(2): 237-247.

493 Avilés, E. C. and Stoeckli, E. T. (2016). Canonical Wnt signaling is required for

494 commissural axon guidance. Dev. Neurobiol. 76, 190-208.

495 Bonner, J., S. L. Gribble, E. S. Veien, O. B. Nikolaus, G. Weidinger and R. I. Dorsky

496 (2008). "Proliferation and patterning are mediated independently in the dorsal spinal cord

497 downstream of canonical Wnt signaling." Developmental biology 313(1): 398-407.

498 Carmon, K. S. and D. S. Loose (2010). "Development of a bioassay for detection of Wnt-

499 binding affinities for individual frizzled receptors." Analytical biochemistry 401(2): 288-

500 294.

501 Chacon, M. A., L. Varela Nallar and N. C. Inestrosa (2008). "Frizzled 1 is involved in the

502 neuroprotective effect of Wnt3a against A oligomers." Journal of cellular physiology

503 217(1): 215- 227.

504 Chapman, S. C., R. Brown, L. Lees, G. C. Schoenwolf and A. Lumsden (2004).

505 "Expression analysis of chick Wnt and frizzled genes and selected inhibitors in early chick

506 patterning." Developmental dynamics 229(3): 668-676.

507 Chesnutt, C., L. W. Burrus, A. M. Brown and L. Niswander (2004). "Coordinate regulation

508 of neural tube patterning and proliferation by TGF and WNT activity." *Developmental*  
509 *biology* 274(2): 334- 347.

510 Dickinson, M. E., R. Krumlauf and A. P. McMahon (1994). "Evidence for a mitogenic  
511 effect of Wnt-1 in the developing mammalian central nervous system." *Development*  
512 120(6): 1453-1471.

513 Fuhrmann, S., M. R. Stark and S. Heller (2003). "Expression of Frizzled genes in the  
514 developing chick eye." *Gene expression patterns* 3(5): 659-662.

515 Galli LM, Munji RN, Chapman SC, Easton A, Li L, Onguka O, Ramahi1 JS, Suriben R,  
516 Szabo LA, Teng C, Tran B, Hannoush RN, Burrus L. W. 2014. FRIZZLED10 mediates  
517 WNT1 and WNT3A signaling in the dorsal spinal cord of the developing chick embryo.  
518 *Dev Dyn* 243:833–843.

519 Garcia-Morales, C., C.-H. Liu, M. Abu-Elmagd, M. K. Hajihosseini and G. N. Wheeler  
520 (2009). "Frizzled-10 promotes sensory neuron development in *Xenopus* embryos."  
521 *Developmental biology* 335(1): 143-155.

522 Goljanek-Whysall, K., Mok, G.F., Fahad Alrefaei, A., Kennerley, N., Wheeler, G.N.,  
523 Munsterberg, A., 2014. myomiR-dependent switching of BAF60 variant incorporation into  
524 Brg1 chromatin remodeling complexes during embryo myogenesis. *Development* 141,  
525 3378-3387

526 Gray, J. D., S. Kholmanskikh, B. S. Castaldo, A. Hansler, H. Chung, B. Klotz, S. Singh,  
527 A. M. Brown and M. E. Ross (2013). "LRP6 exerts non-canonical effects on Wnt signaling  
528 during neural tube closure." *Human molecular genetics* 22(21): 4267-4281. Hartmann, C.



529 and C. J. Tabin (2000). "Dual roles of Wnt signaling during chondrogenesis in the chicken  
530 limb." *Development* 127(14): 3141-3159.

531 He, X., M. Semenov, K. Tamai and X. Zeng (2004). "LDL receptor-related proteins 5 and  
532 6 in Wnt/  $\beta$ -catenin signaling: arrows point the way." *Development* 131(8): 1663-1677.

533 Hollyday, M., McMahon, J. A. and McMahon, A. P. (1995). Wnt expression patterns in  
534 chick embryo nervous system. *Mech. Dev.* 1, 9-25.

535 Houston, D. W. and C. Wylie (2002). "Cloning and expression of *Xenopus* Lrp5 and Lrp6  
536 genes." *Mechanisms of development* 117(1): 337-342

537 Hua, Z. L., S. Jeon, M. J. Caterina and J. Nathans (2014). "Frizzled3 is required for the  
538 development of multiple axon tracts in the mouse central nervous system." *Proceedings of*  
539 *the National Academy of Sciences* 111(29): E3005-E3014.

540 Ikeya, M., S. M. Lee, J. E. Johnson, A. P. McMahon and S. Takada (1997). "Wnt signalling  
541 required for expansion of neural crest and CNS progenitors." *Nature* 389(6654): 966-970.

542 Ille, F., S. Atanasoski, S. Falk, L. M. Ittner, D. Märki, S. Büchmann-Møller, H. Wurdak,  
543 U. Suter, M. M. Taketo and L. Sommer (2007). "Wnt/BMP signal integration regulates the  
544 balance between proliferation and differentiation of neuroepithelial cells in the dorsal  
545 spinal cord." *Developmental biology* 304(1): 394-408.

546 Kawakami Y, Wada N, Nishimatsu S, Nohno T. 2000b. Involvement of Frizzled-10 in  
547 Wnt-7a signaling during chick limb development. *Dev Growth Differ* 42:561–569.

548 Le Dréau, G. and E. Martí (2012). "Dorsal–ventral patterning of the neural tube: a tale of

- 549 three signals." *Developmental neurobiology* 72(12): 1471-1481.
- 550 Logan, C. Y. and R. Nusse (2004). "The Wnt signaling pathway in development and  
551 disease." *Annu. Rev. Cell Dev. Biol.* 20: 781-810.
- 552 MacDonald, B. T. and X. He (2012). "Frizzled and LRP5/6 receptors for Wnt/  $\beta$ -catenin  
553 signaling." *Cold Spring Harbor perspectives in biology* 4(12): a007880.
- 554 Megason, S. G. and A. P. McMahon (2002). "A mitogen gradient of dorsal midline Wnts  
555 organizes growth in the CNS." *Development* 129(9): 2087-2098.
- 556 Mok, G.F., Lozano-Velasco, E., Maniou, E., Viaut, C., Moxon, S., Wheeler, G. and A.E.  
557 Münsterberg (2018). miR-133-mediated regulation of the Hedgehog pathway orchestrates  
558 embryo myogenesis. *Development* 145. doi:10.1242/dev.159657
- 559 Moon, R. T., A. D. Kohn, G. V. De Ferrari and A. Kaykas (2004). "WNT and  $\beta$ -catenin  
560 signalling: diseases and therapies." *Nature Reviews Genetics* 5(9): 691-701.
- 561 Moriwaki, J., E. Kajita, H. Kirikoshi, J. Koike, N. Sagara, Y. Yasuhiko, T. Saitoh, M. Hirai,  
562 M. Katoh and K. Shiokawa (2000). "Isolation of *Xenopus* frizzled-10A and frizzled-10B  
563 genomic clones and their expression in adult tissues and embryos." *Biochemical and*  
564 *biophysical research communications* **278**(2): 377-384.
- 565 Muroyama, Y., M. Fujihara, M. Ikeya, H. Kondoh and S. Takada (2002). "Wnt signaling  
566 plays an essential role in neuronal specification of the dorsal spinal cord." *Genes &*  
567 *development* 16(5): 548- 553.
- 568 Quinlan, R., M. Graf, I. Mason, A. Lumsden and C. Kiecker (2009). "Complex and

569 dynamic patterns of Wnt pathway gene expression in the developing chick forebrain."

570 *Neural development* 4(1): 1.

571 Stark, M. R., J. J. Biggs, G. C. Schoenwolf and M. S. Rao (2000). "Characterization of

572 avian frizzled genes in cranial placode development." *Mechanisms of development* 93(1):

573 195-200.

574 Tamai, K., X. Zeng, C. Liu, X. Zhang, Y. Harada, Z. Chang and X. He (2004). "A

575 mechanism for Wnt coreceptor activation." *Molecular cell* 13(1): 149-156.

576 Theodosiou, N. A. and C. J. Tabin (2003). "Wnt signaling during development of the

577 gastrointestinal tract." *Developmental biology* 259(2): 258-271.

578 van Amerongen, R. and Berns, A. 2006. Knockout mouse models to study Wnt signal

579 transduction. *Trends Genet.* **22**: 678–689.

580 Wang, Y., N. Guo and J. Nathans (2006). "The role of Frizzled3 and Frizzled6 in neural

581 tube closure and in the planar polarity of inner-ear sensory hair cells." *The Journal of*

582 *neuroscience* 26(8): 2147-2156.

583 Wheeler, G. N. and S. Hoppler (1999). "Two novel *Xenopus* frizzled genes expressed in

584 developing heart and brain." *Mechanisms of development* **86**(1): 203-207.

585 Yu, H., P. M. Smallwood, Y. Wang, R. Vidaltamayo, R. Reed and J. Nathans (2010).

586 "Frizzled 1 and frizzled 2 genes function in palate, ventricular septum and neural tube

587 closure: general implications for tissue fusion processes." *Development* 137(21): 3707-

588 3717.

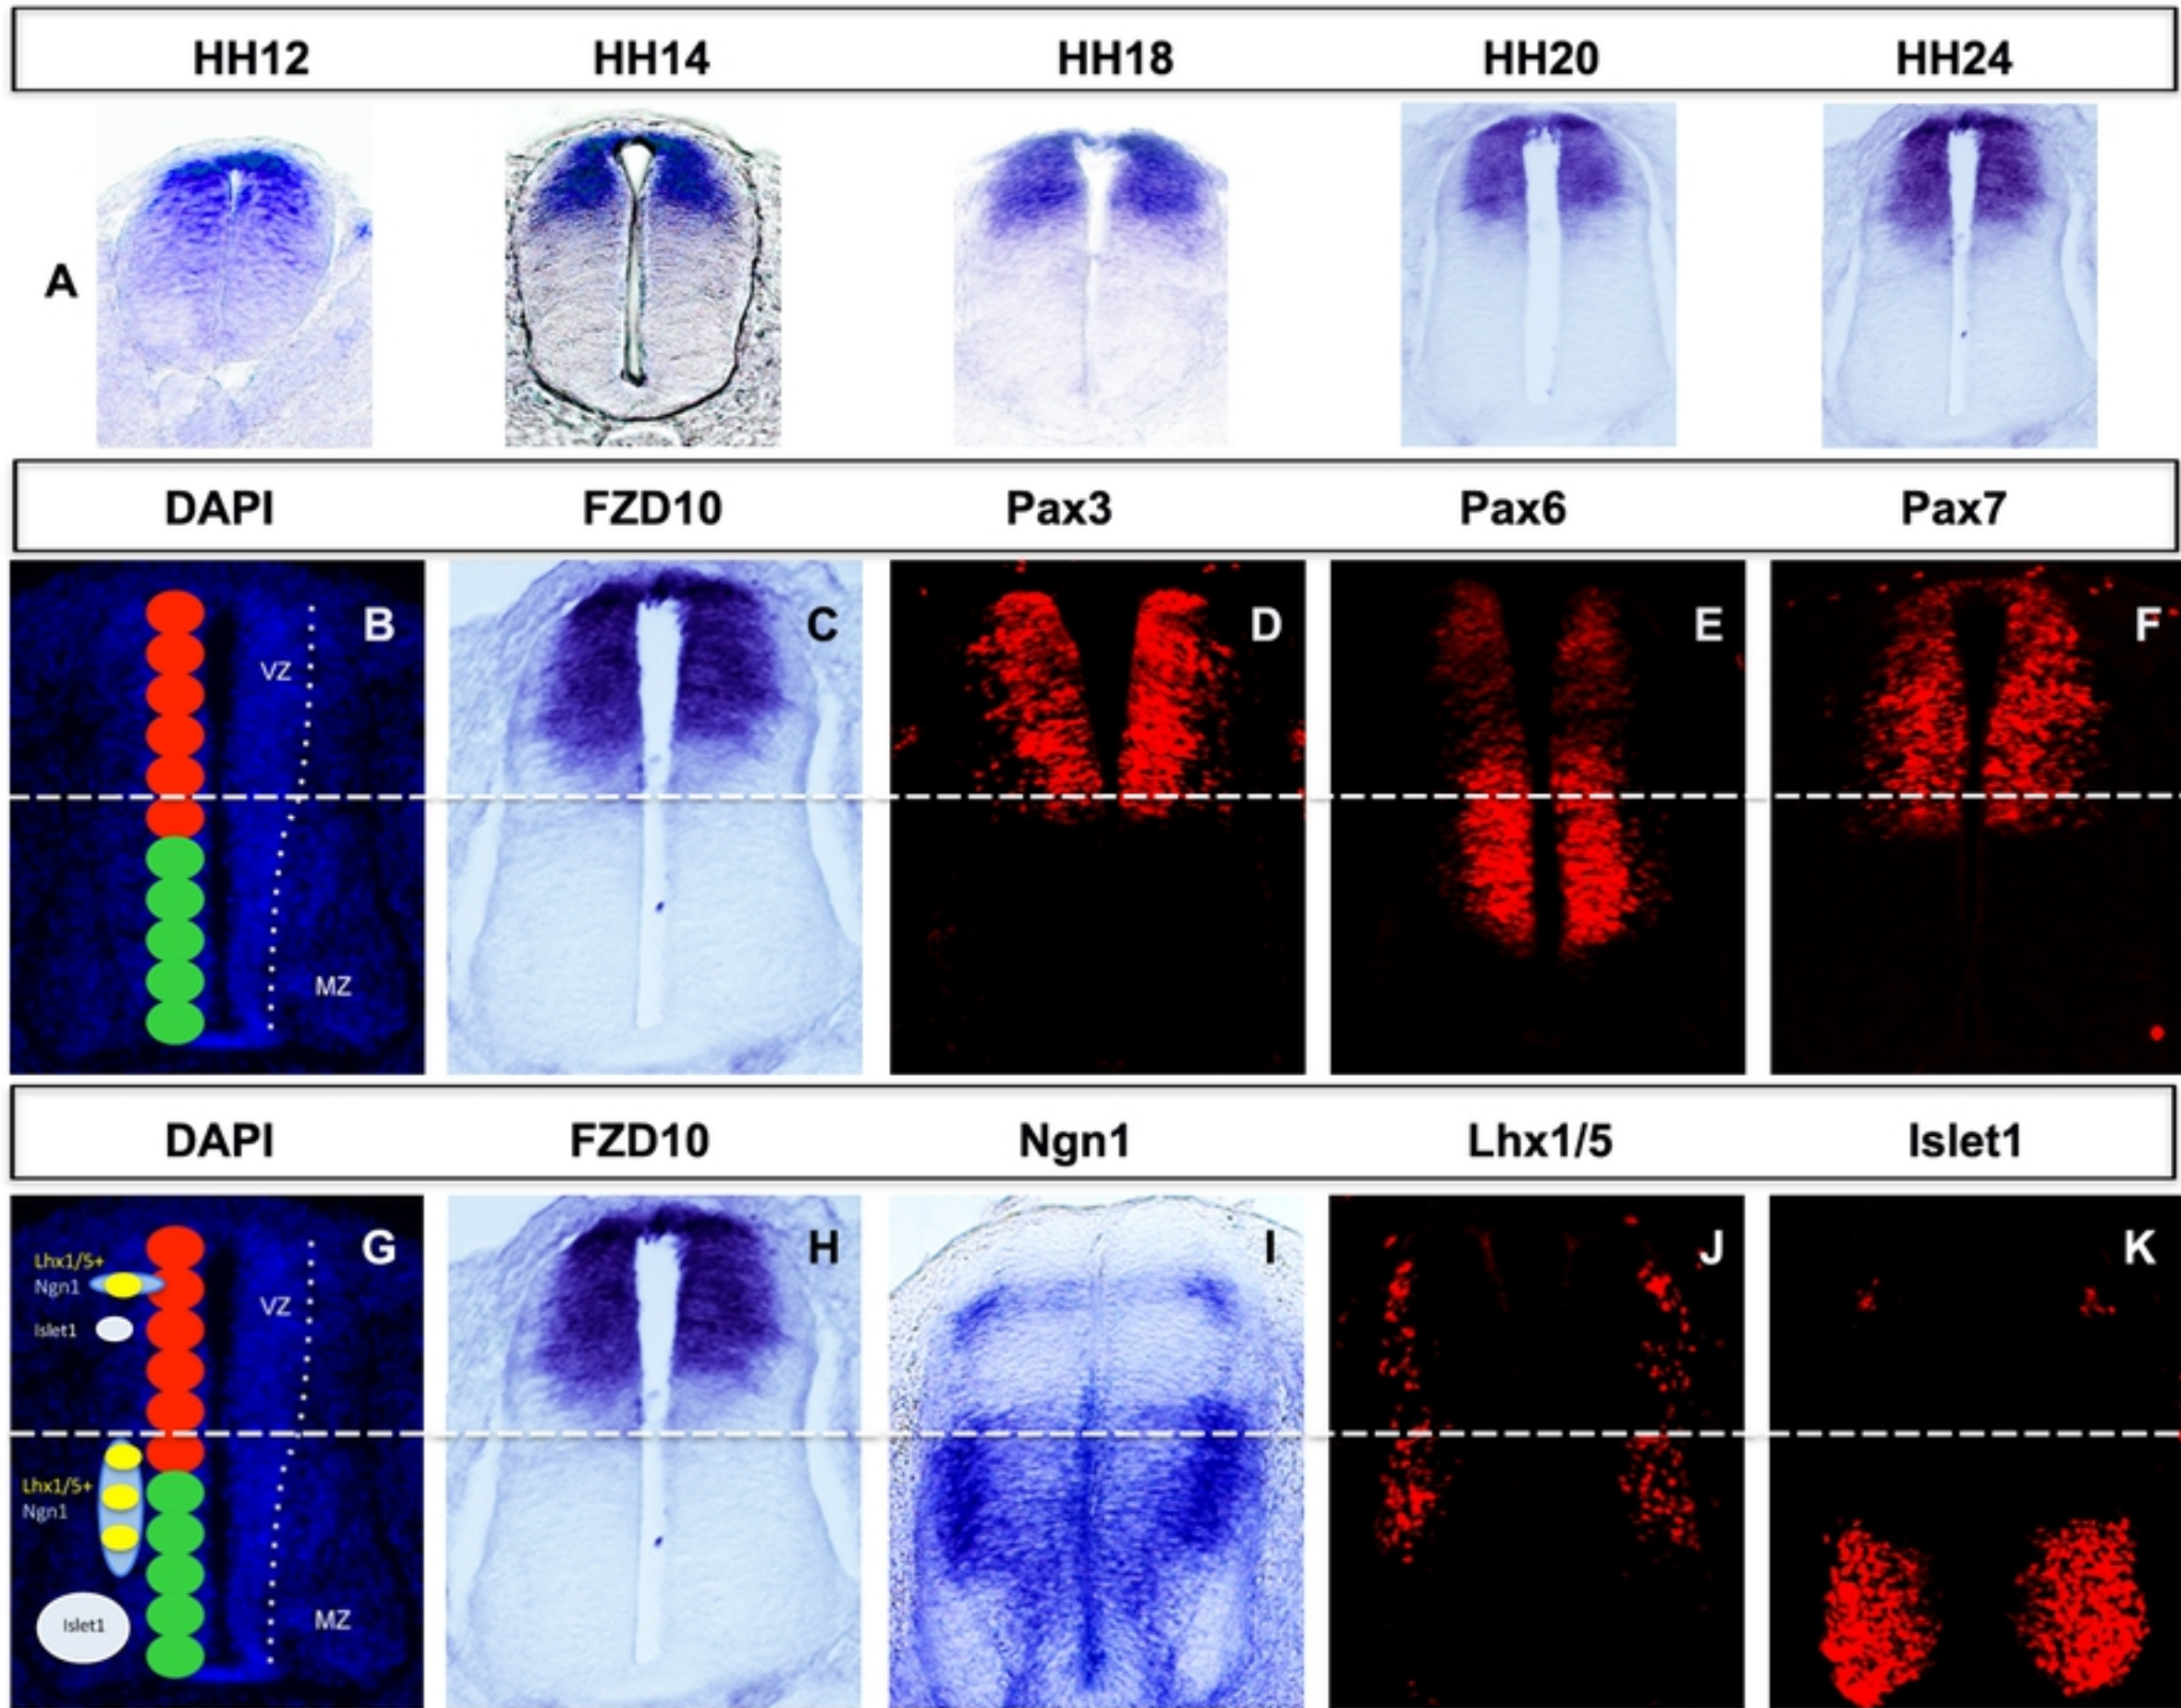

Figure 1

**DAPI/pH3****DAPI/RFP/pH3****Average Cell Number****Scrambled sh-RNA-RFP**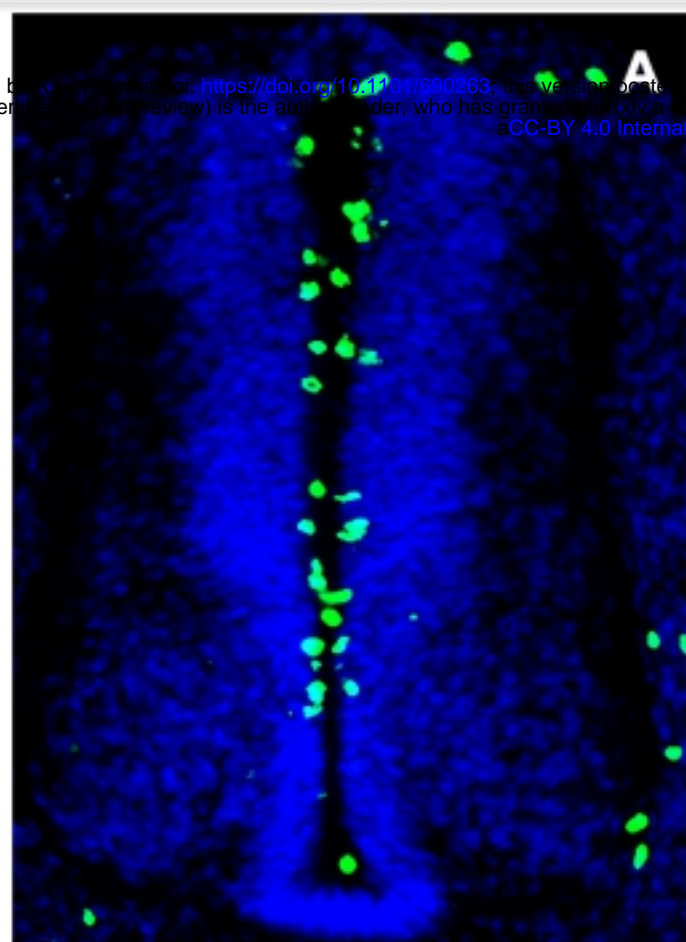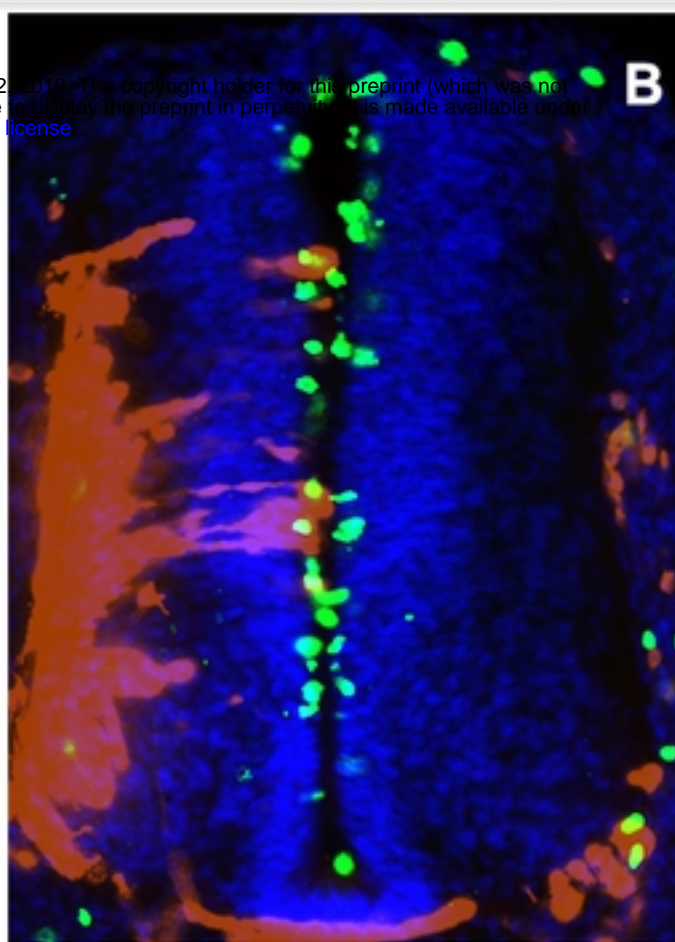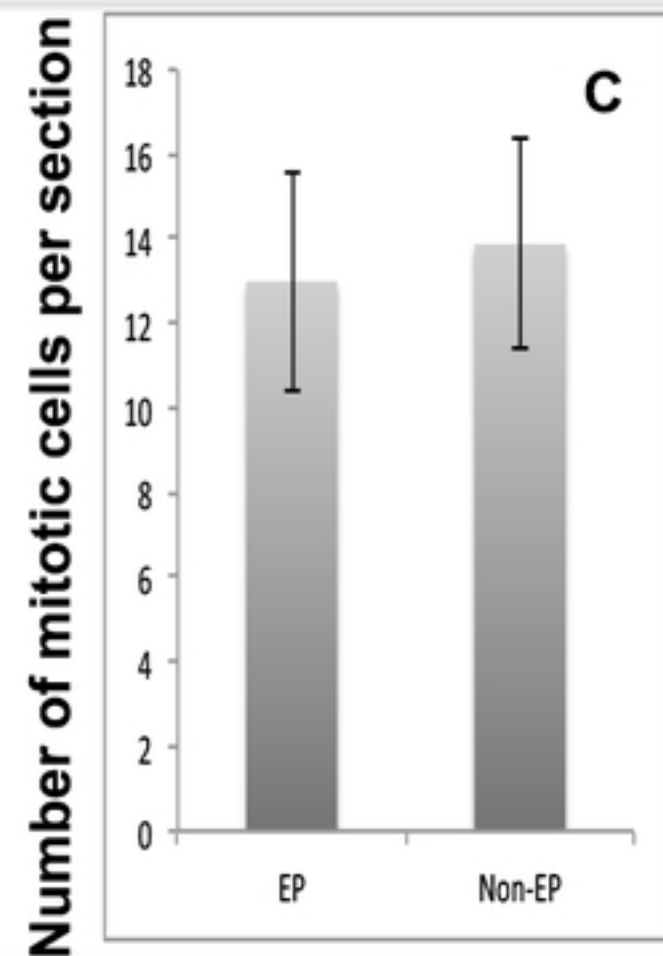**DAPI/pH3****DAPI/RFP/pH3****Average Cell Number****FZD10 sh-RNA-RFP**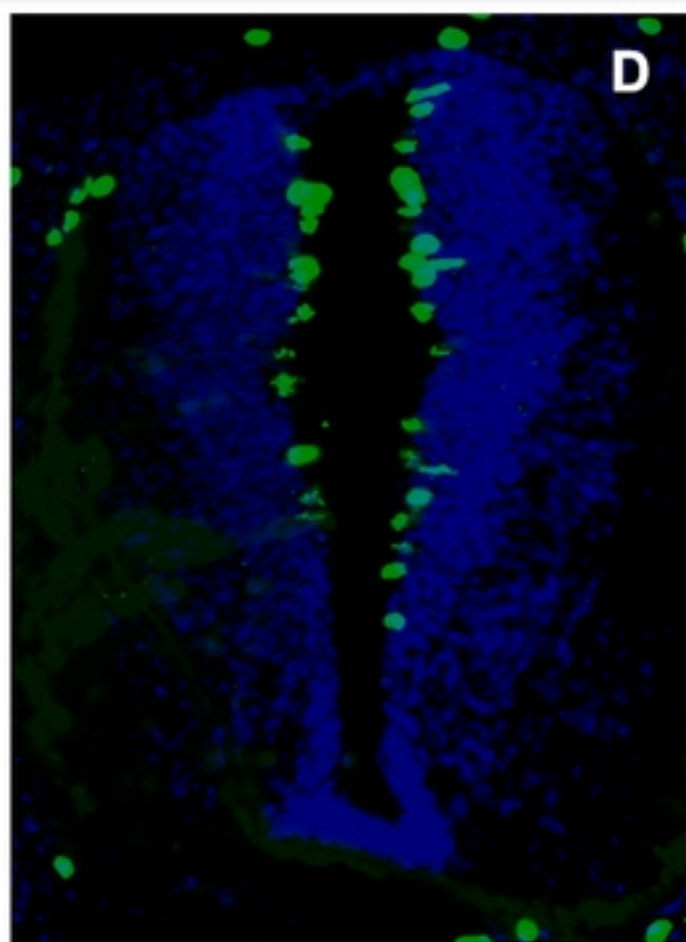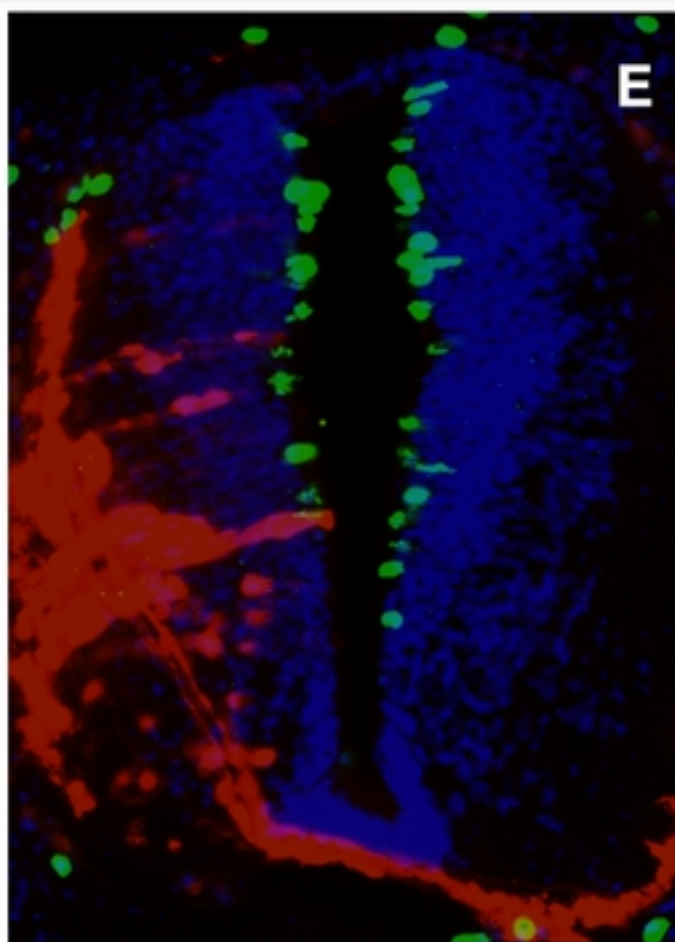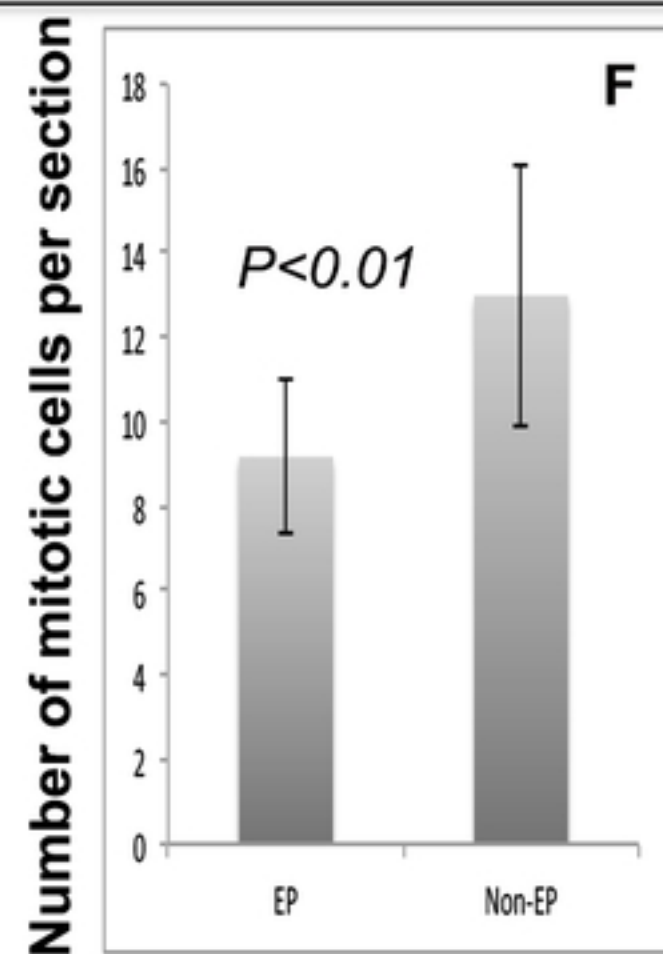**Figure 2**

Scrambled sh-RNA

FZD10 Sh-RNA

FZD10 Sh-RNA

Pax7

Pax7/RFP

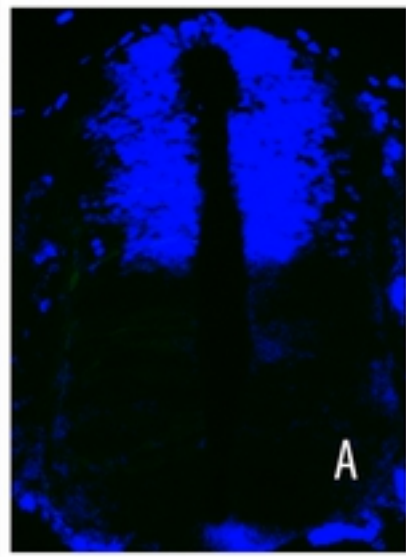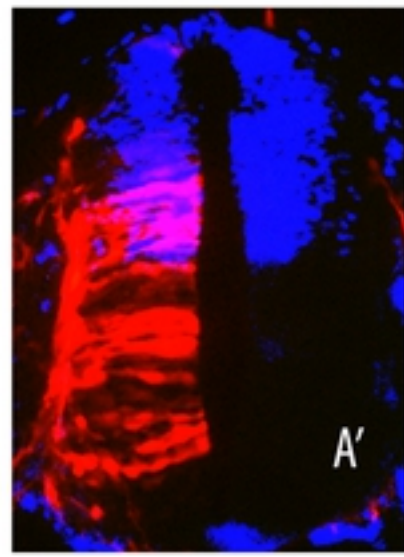

Pax7

Pax7/RFP

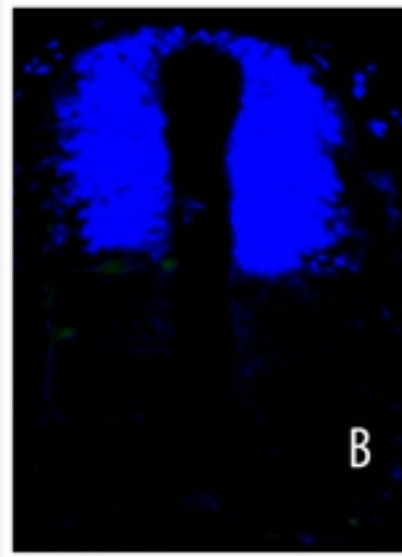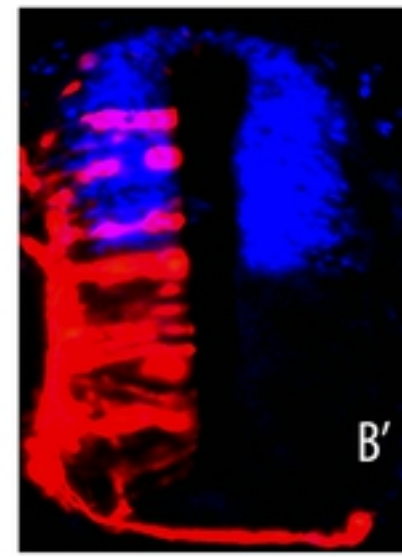

**Pax7**

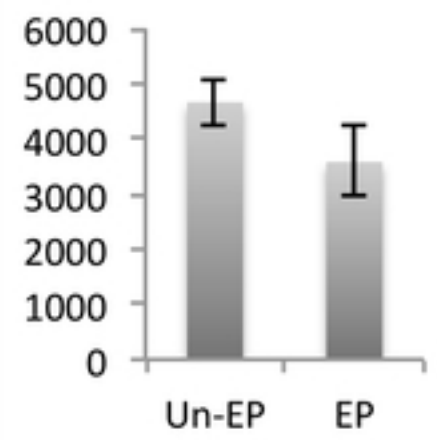

Pax6

Pax6/RFP

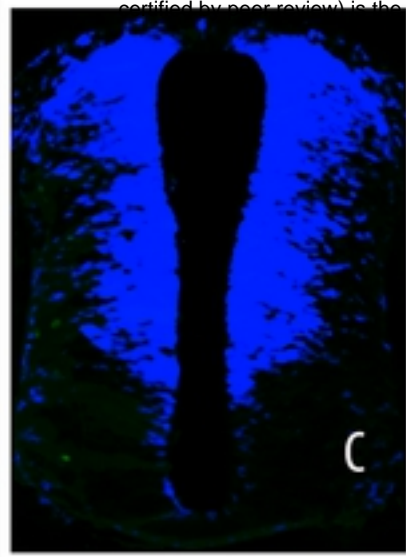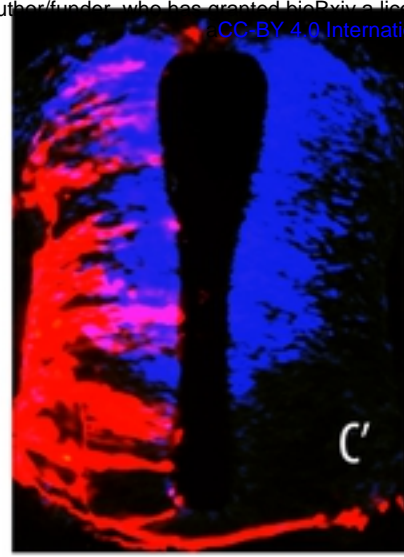

Pax6

Pax6/RFP

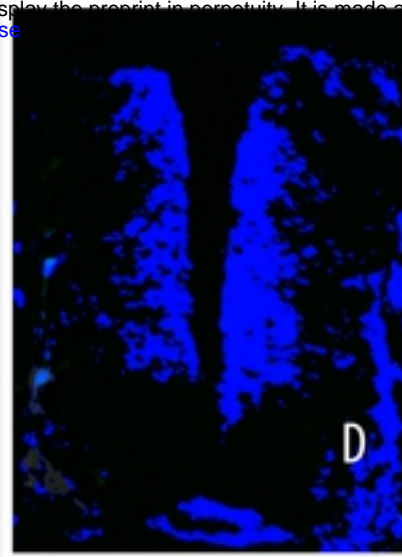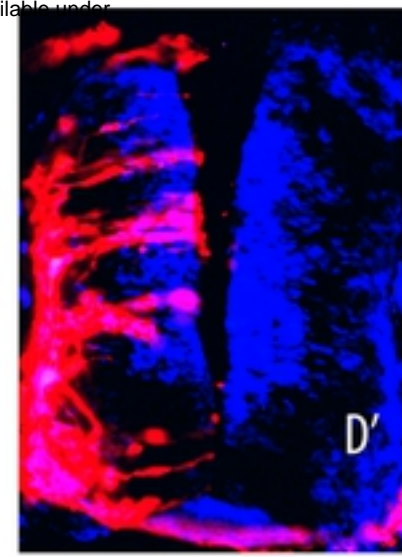

**Pax6**

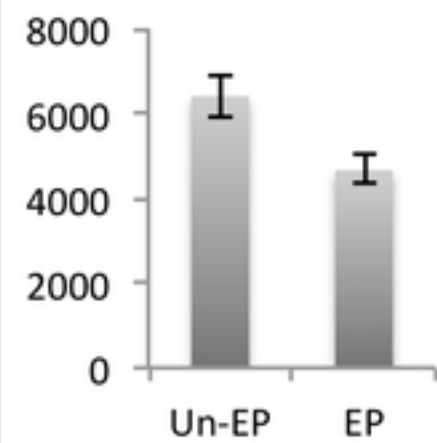

Lhx1/5

Lhx1/5-RFP

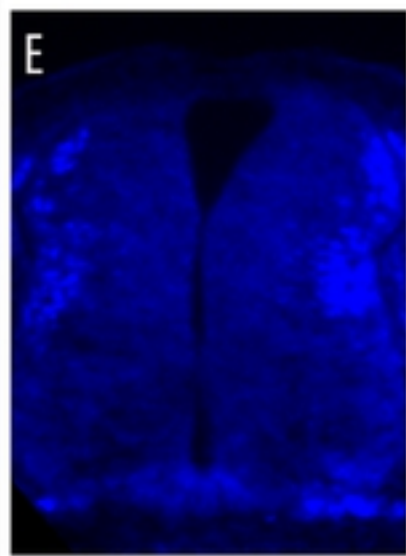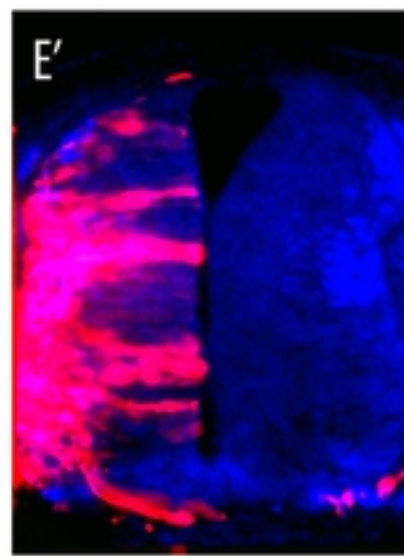

Lhx1/5

Lhx1/5-RFP

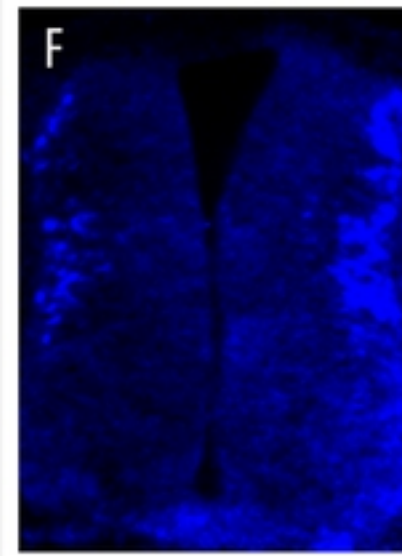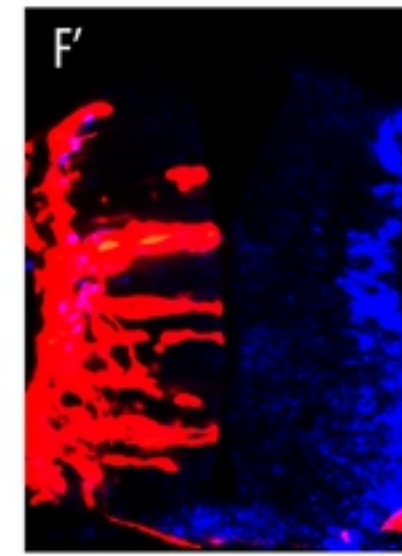

**Lhx1/5**

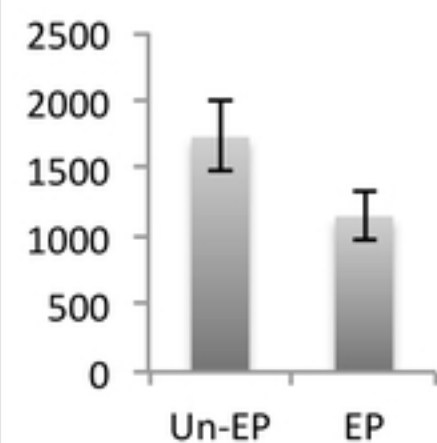

Tuj-1

Tuj-1/RFP

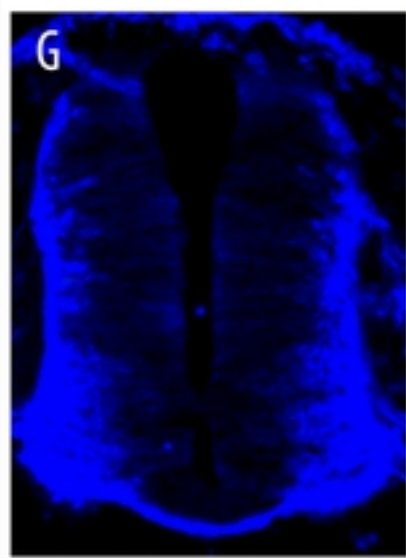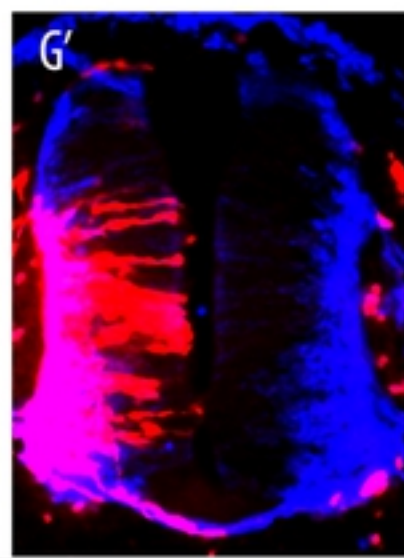

Tuj-1

Tuj-1/RFP

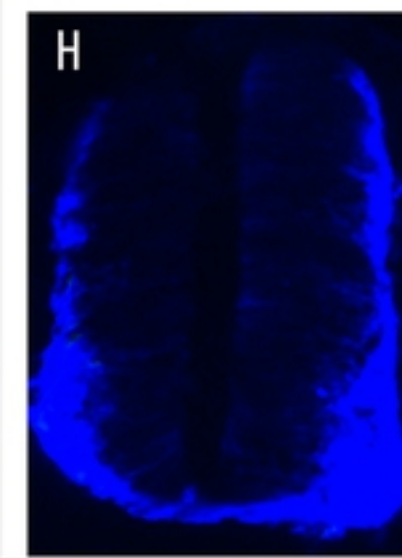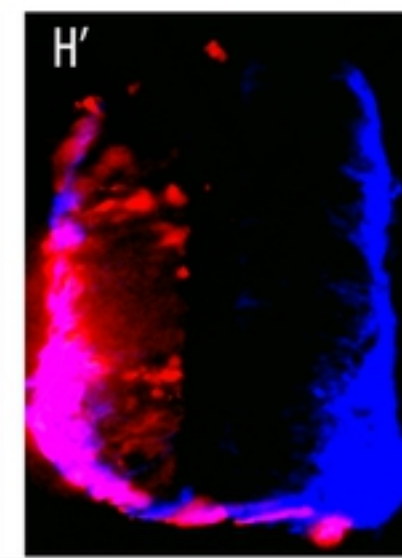

**Tuj1**

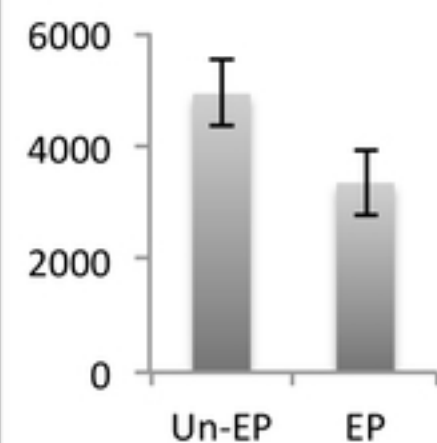

bioRxiv preprint doi: <https://doi.org/10.1101/690263>; this version posted July 2, 2019. The copyright holder for this preprint (which was not certified by peer review) is the author/funder, who has granted bioRxiv a license to display the preprint in perpetuity. It is made available under aCC-BY 4.0 International license.

Figure 3

## pCiG-Wnt1-IRES-GFP-48hrs

## Avg Expression Area

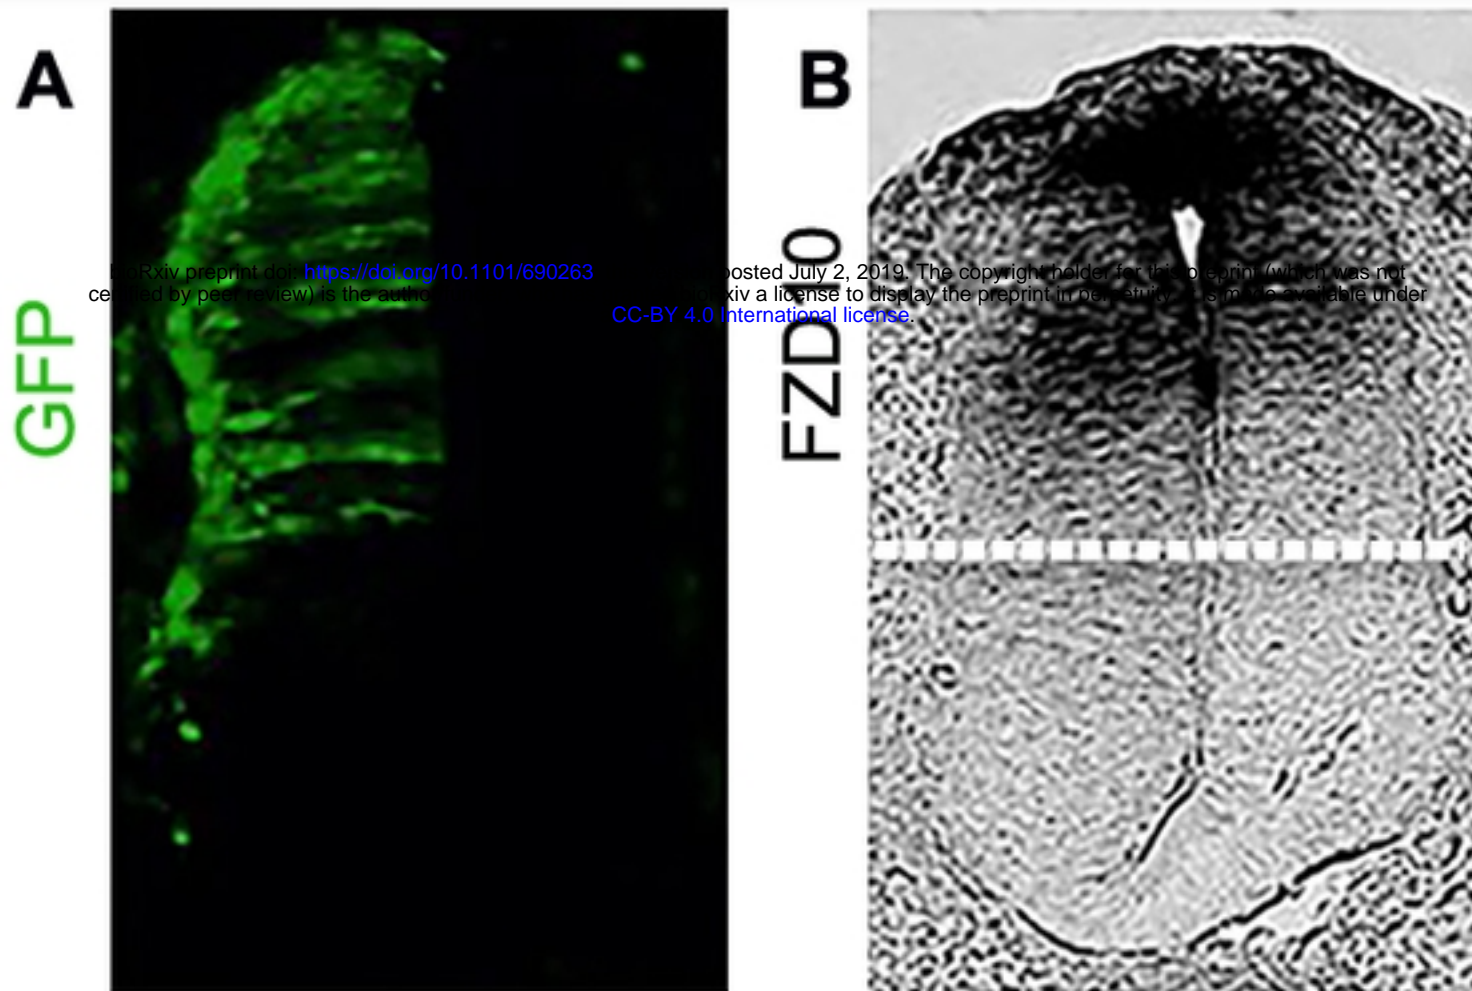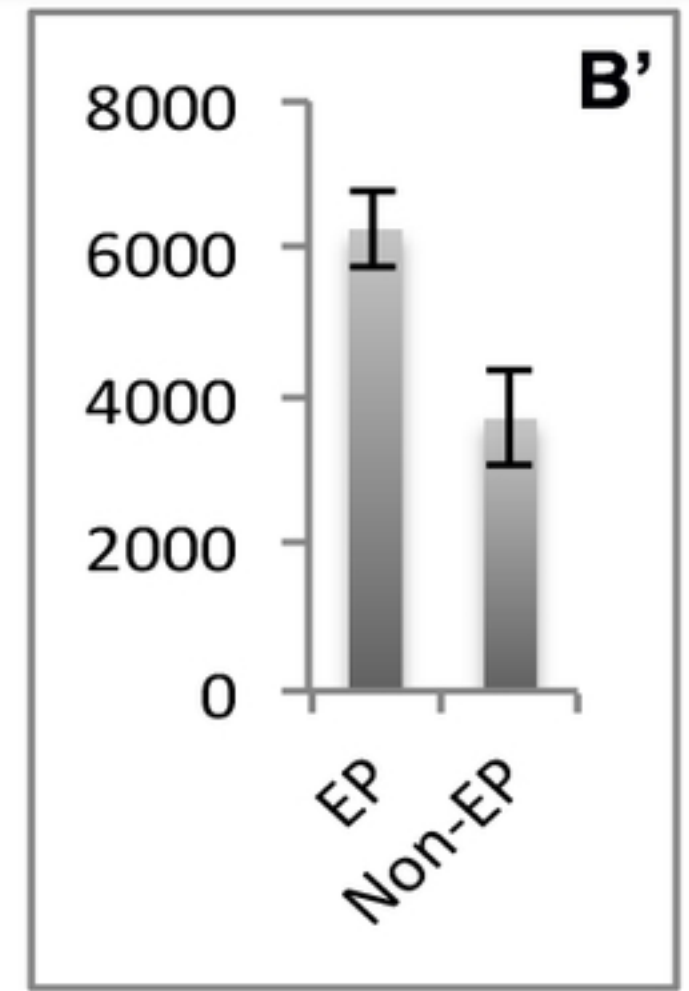

## pCiG-Wnt3a-IRES-GFP-48hrs

## Avg Expression Area

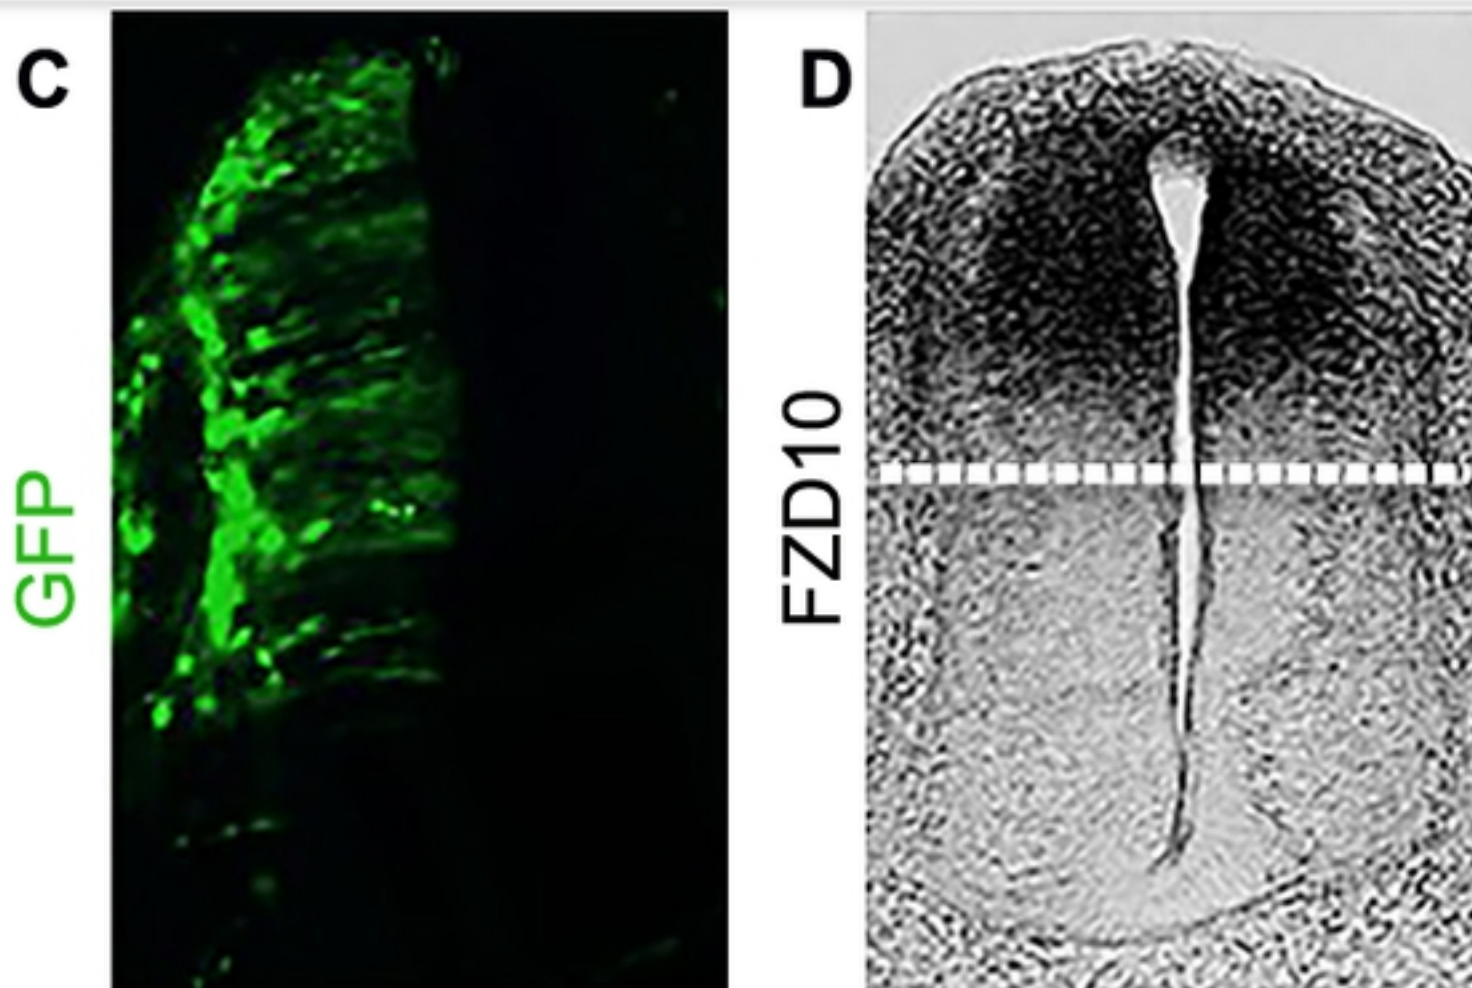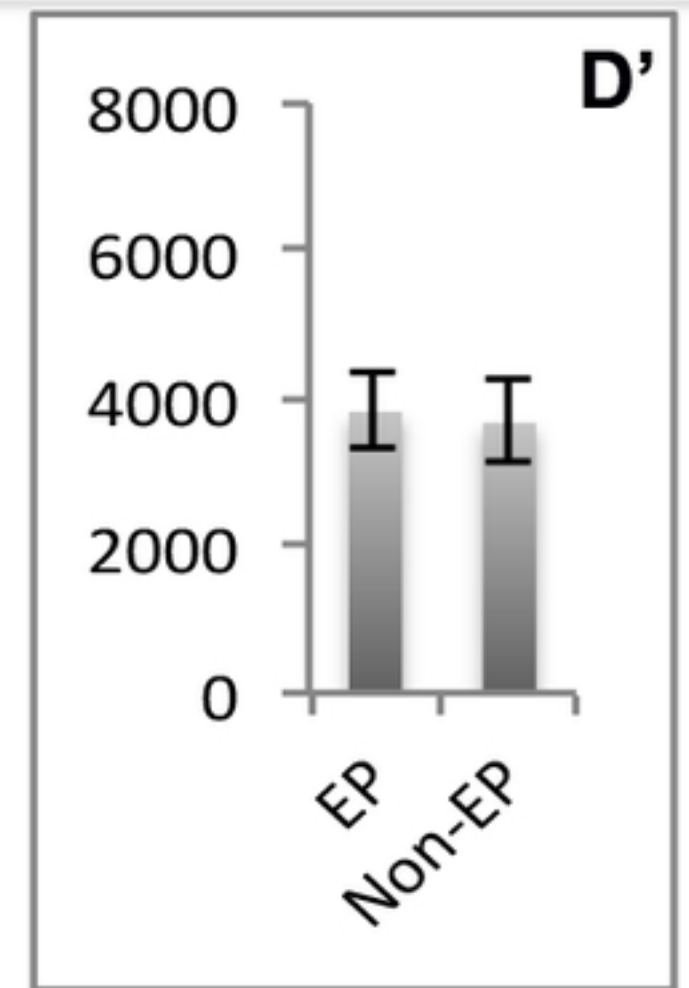

Figure 4

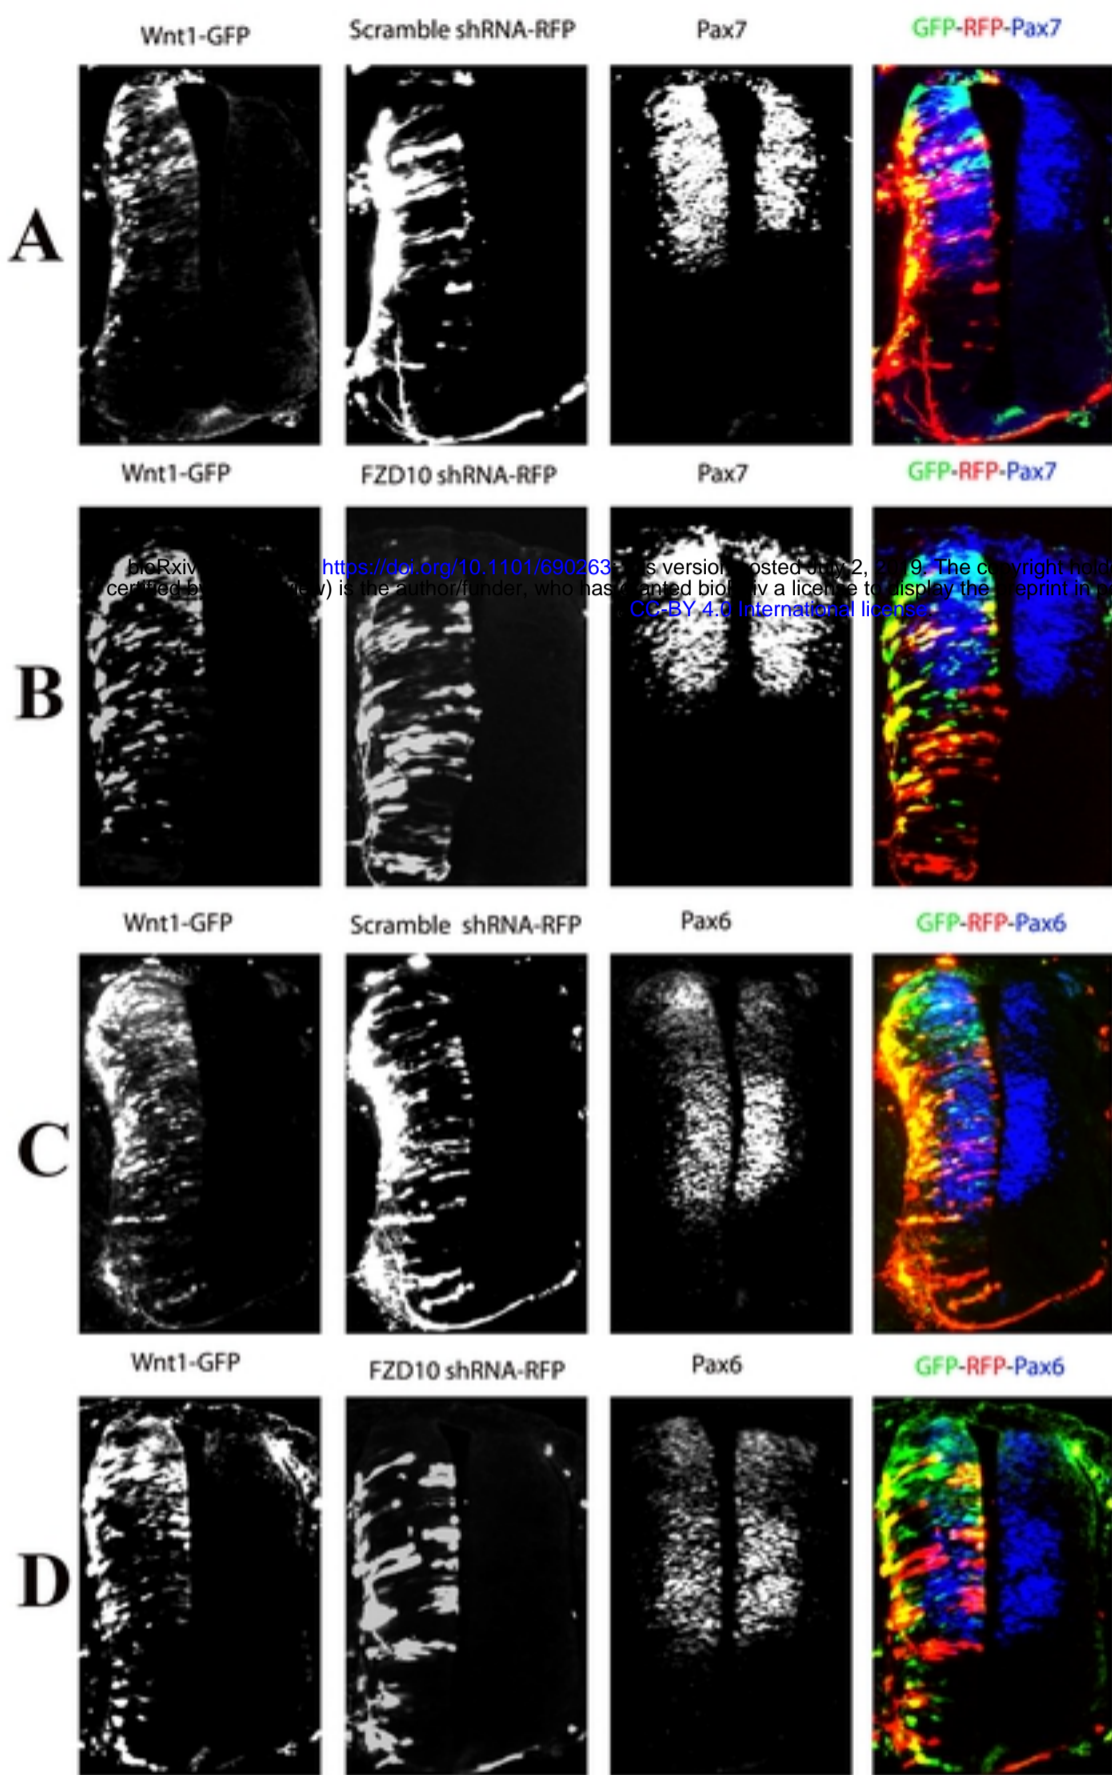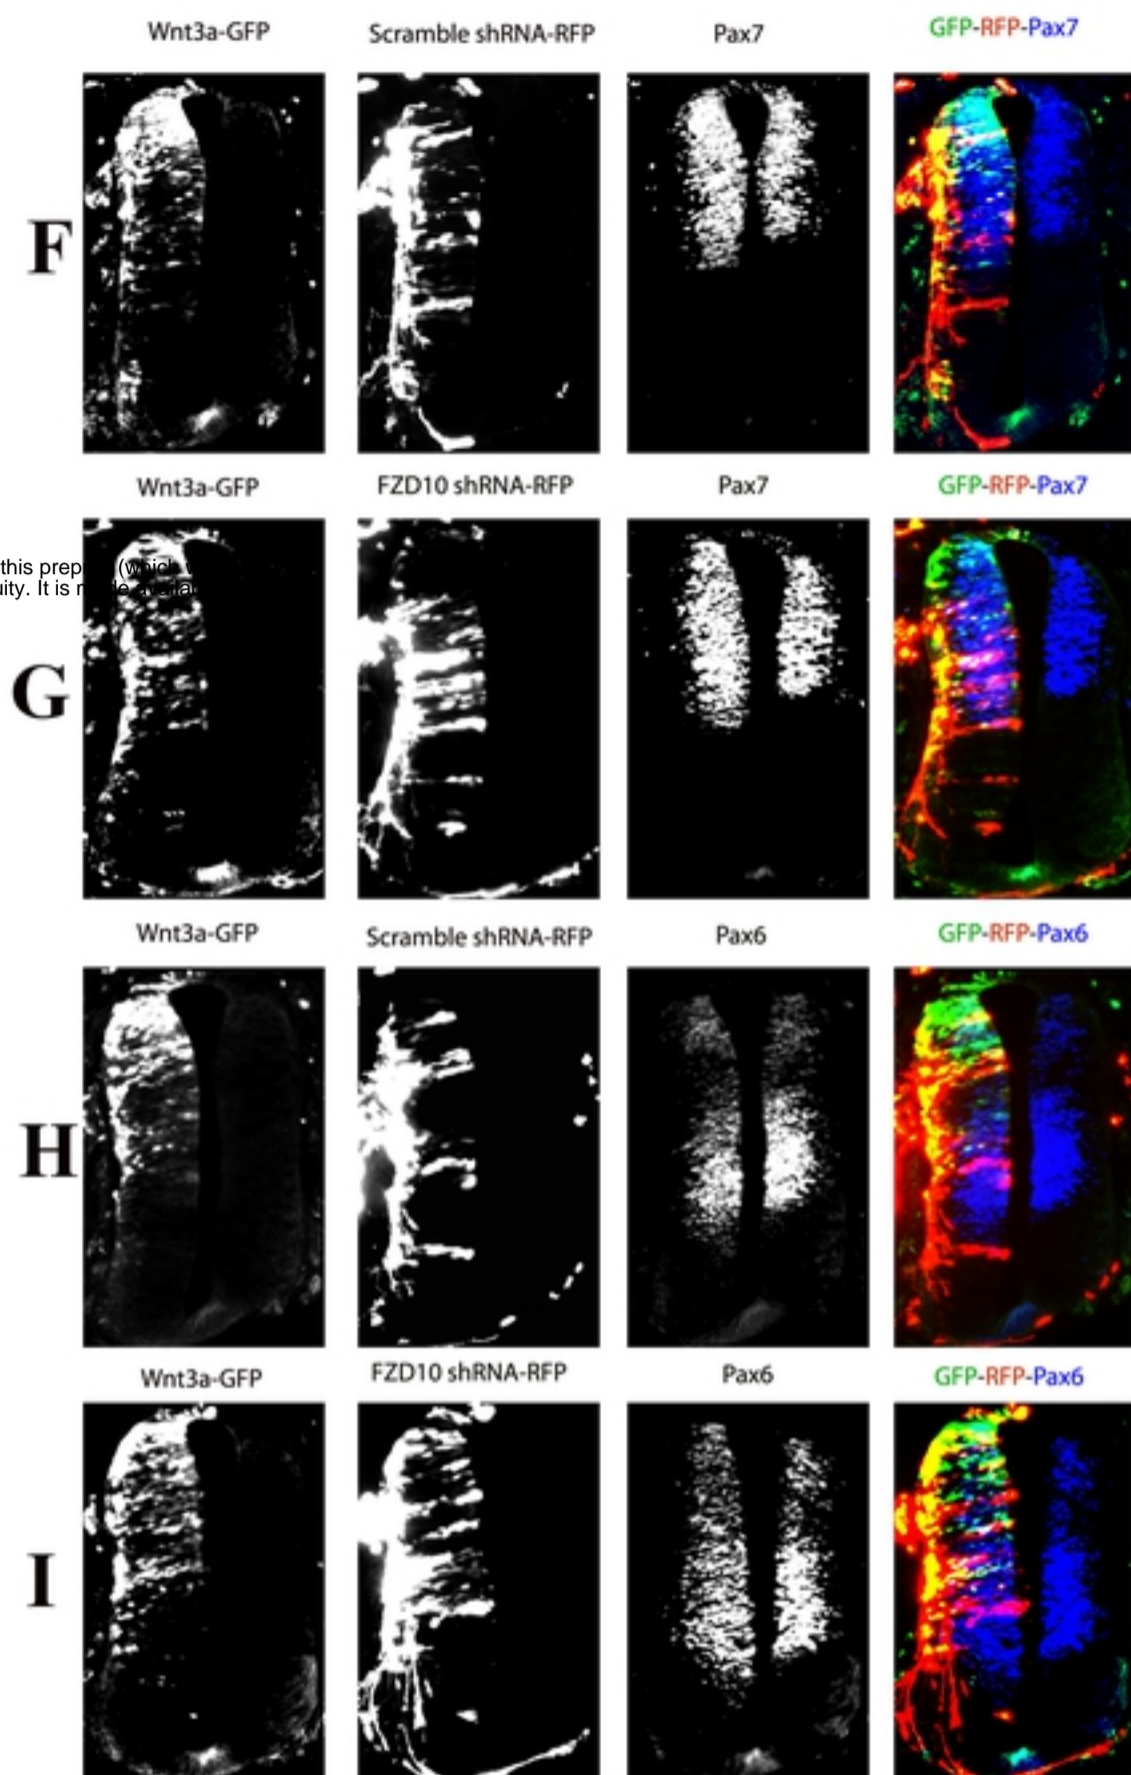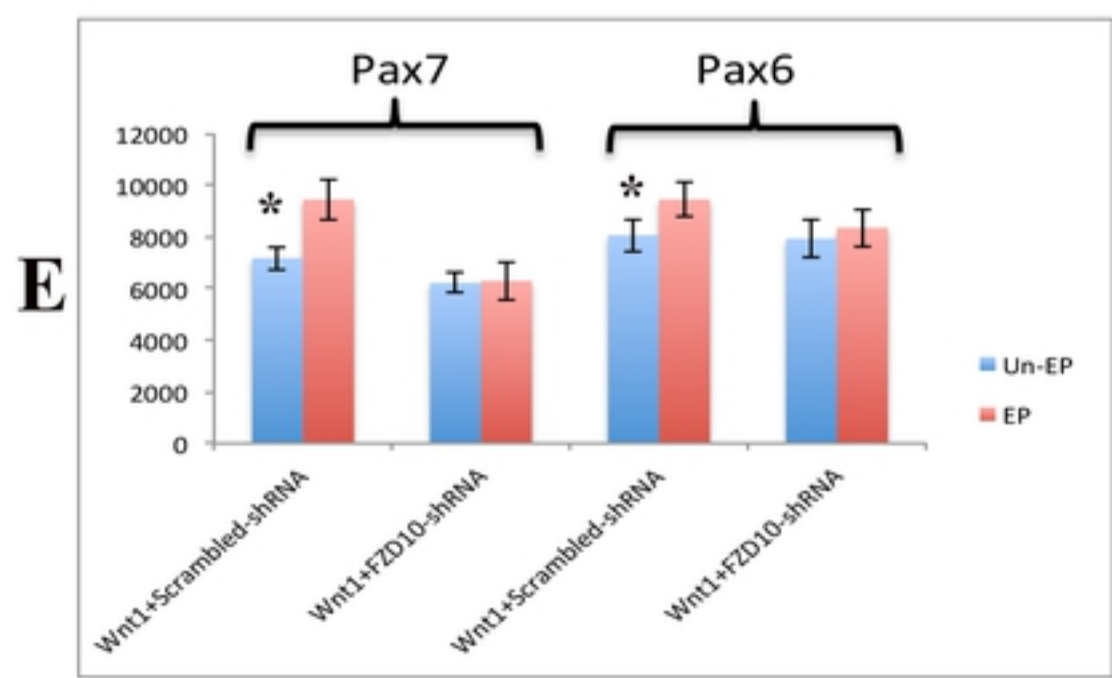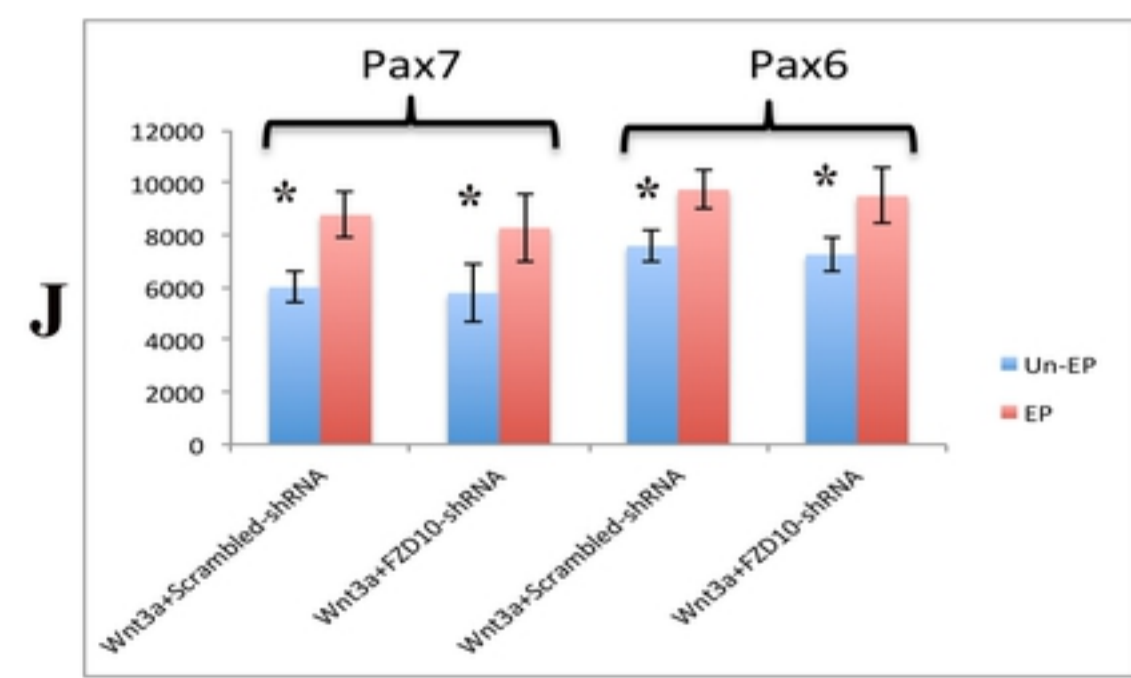

Figure 5



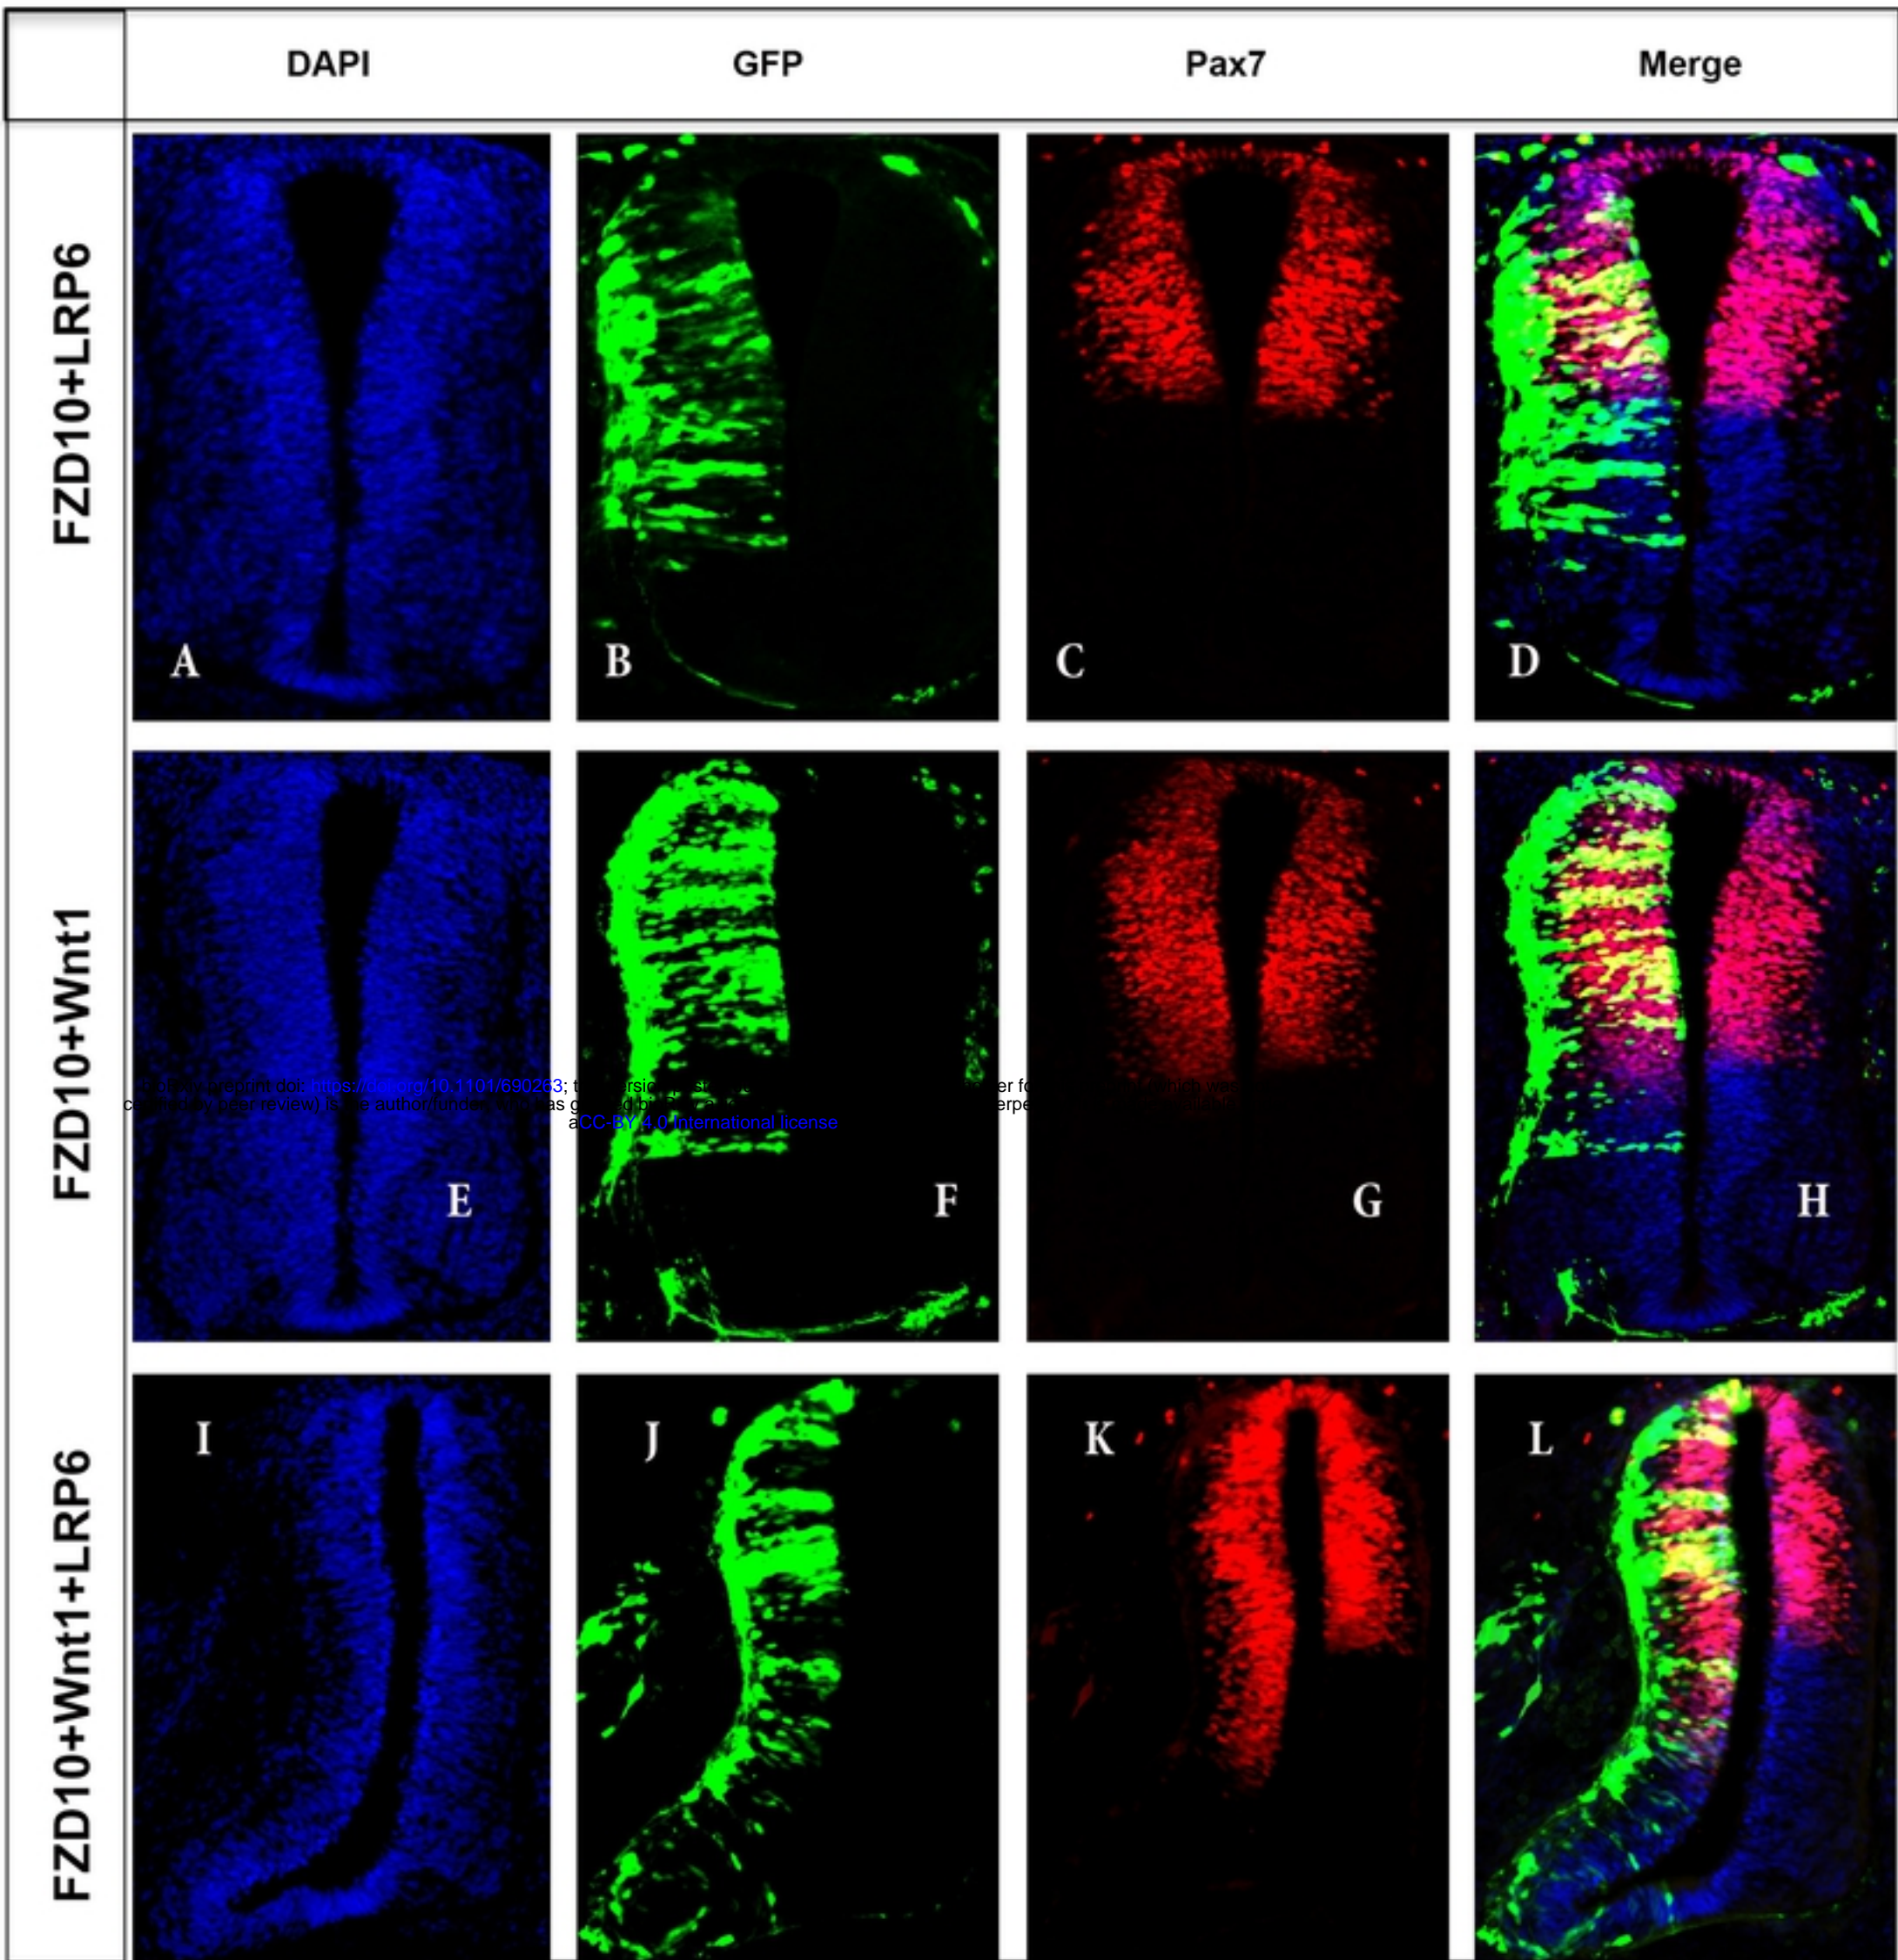

Normalised Luc activity

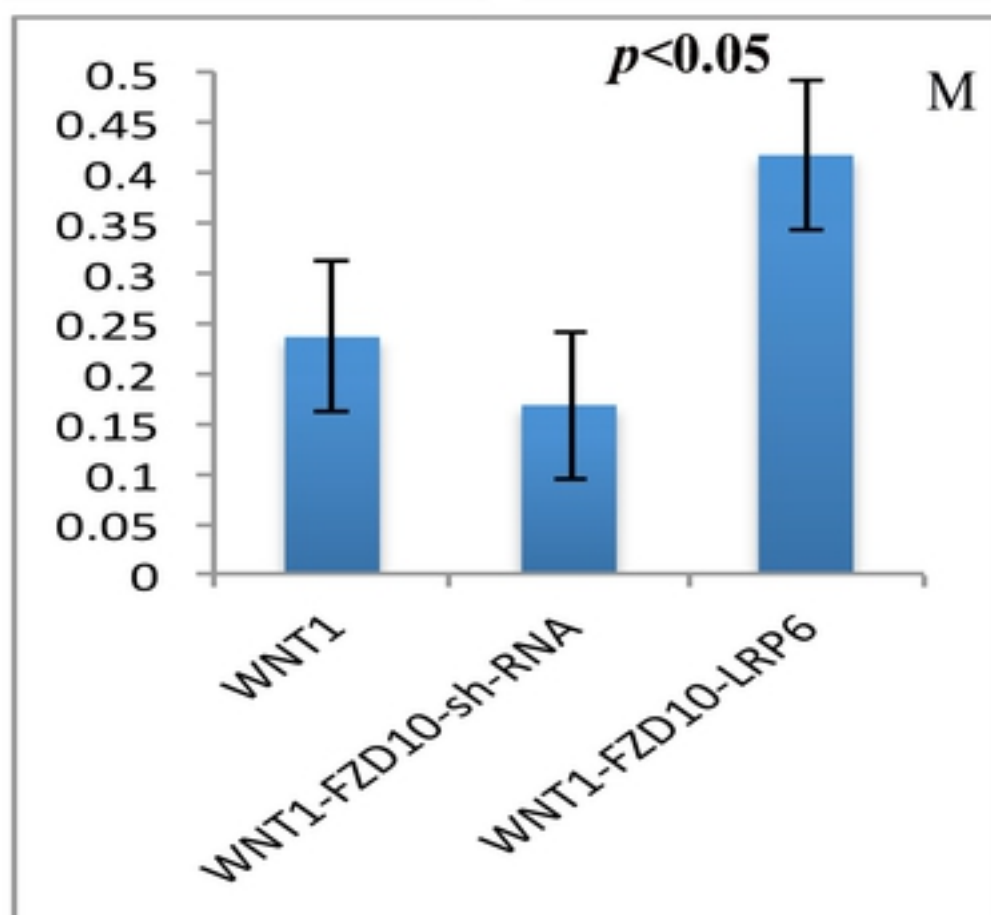

Figure 6
